# Supplementary material for: N-terminal β-strand underpins biochemical specialization of an ATG8 isoform
Source: PLoS Biol. 2019 Jul 22;17(7):e3000373. doi: 10.1371/journal.pbio.3000373 (PMC6675122; doi:10.1371/journal.pbio.3000373)
Supplement: S5 Table — The N. benthamiana proteins in the dataset (291 proteins) were divided into enrichment categories based on whether they showed a significantly (p < 0.05) stronger interaction with ATG8-2.2 or ATG8-4, as determined by an ANOVA with a post hoc Tukey test; interactors that showed no significant difference in their interaction with either protein were categorized as “common” (“enrichment” column). This resulted in 178 interactors being defined as ATG8-2.2 enriched, 6 as ATG8-4 enriched, and 107 as common. For each ATG8-2.2 enriched interactor, we determined whether ATG8-4-S3 showed a significant (p < 0.05) difference in its interaction strength compared with ATG8-2.2, using an ANOVA with a post hoc Tukey test (“S3-2.2” column). Proteins that showed no statistical difference in their interaction with ATG8-4-S3 compared with ATG8-2.2 are categorized as “+”; those that showed a statistically weaker interaction are categorized as “−.” For each ATG8-4 specific interactor, it was determined whether ATG8-4-S3 showed a significant (p < 0.05) difference in its interaction strength compared with ATG8-4 using an ANOVA with a post hoc Tukey test (“S3-4” column). Proteins that showed no statistical difference in their interaction with ATG8-4-S3 compared with ATG8-4 are categorized as “+”; those that showed a statistically weaker interaction are categorized as “−.” In addition to this analysis, the same interactor descriptions from the ATG8 interactome (S1 Table) were included—including predicted AIMs, A. thaliana orthologs, GO annotations, M. polymorpha orthologs, and AIM conservation in both species—along with the averaged GFP normalized peptide count data for all constructs. AIM, ATG8-interacting motif; ATG8, autophagy-related protein 8; GFP, green fluorescent protein; GO, gene ontology. (XLSX) [file pbio.3000373.s021.xlsx]

## Sheet: TableS4_Swap3_processes_compart
enrichment	S3-2.2	S3-4	Nb	Nb_protein_ID	Nb_AIMs	At	At_evalue	At_protein_ID	At_conserved_AIMs	At_compartment	At_biological_process	Mp	Mp_evalue	Mp_protein_ID	Mp_conserved_AIMs	ATG8-2.2_AVG	ATG8-4_AVG	Swap3_AVG	EV_AVG
ATG8-2.2 enriched	-		Nbv6.1trA199873	rrp15-like protein		AT1G44770.1	3e-99	elongation factor		NA	translational elongation	Mapoly0023s0096.2	3e-27	unknown		42.0283	0	0	0
ATG8-2.2 enriched	-		Nbv6.1trA203551	coatomer subunit alpha-1-like		AT1G62020.1	0	Coatomer 2c alpha subunit		COPI vesicle coat, cytosol, Golgi membrane, plasma membrane	ER to Golgi vesicle-mediated transport, intra-Golgi vesicle-mediated transport, intracellular protein transport, retrograde vesicle-mediated transport, Golgi to ER	Mapoly0007s0005.1	0	coatomer protein complex		430.677	0	0	0
ATG8-2.2 enriched	-		NbS00024469g0004.1	MADS box interactor		AT1G44770.1	5e-84	elongation factor		NA	translational elongation	Mapoly0023s0095.2	1e-20	unknown		40.2882	0	0	0
ATG8-2.2 enriched	-		Nbv6.1trA78626	importin-9	1	AT1G26170.1	0	ARM repeat superfamily protein	1	cytosol, nuclear envelope	protein import into nucleus	Mapoly0176s0015.1	0	importin 9	0	31.1344	0	5.47945	0
ATG8-2.2 enriched	-		Nbv6.1trA24849	myosin-binding protein 1	2	AT1G08800.4	2e-60	myosin-binding protein	0	NA	NA	Mapoly0056s0058.8	2e-20	zein-binding	0	59.4195	0	0	0
ATG8-2.2 enriched	-		NbS00002437g0006.1	hypothetical protein VITISV_033286	2	AT2G32240.1	0	early endosome antigen	1	NA	NA	Mapoly0001s0335.1	0.004	E3 ubiquitin ligase involved in syntaxin degradation	0	787.891	9.92429	246.706	2.29669
ATG8-2.2 enriched	-		Nbv6.1trA226360	leucine-rich repeat-containing protein ddb_g0290503	2	AT2G32240.1	0	early endosome antigen	1	NA	NA	Mapoly0001s0335.1	0.003	E3 ubiquitin ligase involved in syntaxin degradation	0	761.415	10.5245	249.376	0
ATG8-2.2 enriched	-		Nbv6.1trA93034	rab11 family-interacting protein 3 isoform x1		AT1G62020.1	1e-98	ELKS/Rab6-interacting/CAST family protein		NA	NA	Mapoly0005s0053.1	1e-46	unknown		230.655	0	0	0
ATG8-2.2 enriched	-		Nbv6.1trA162946	60s ribosomal protein l4-1-like		AT3G09630.1	0	Ribosomal protein L4/L1 family		ribosome	translation	Mapoly0116s0033.3	0	large subunit ribosomal protein L4e		175.56	0	0	0
ATG8-2.2 enriched	-		Nbv6.1trP2377	mannosylglycoprotein endo-beta-mannosidase	1	AT1G09010.1	0	glycoside hydrolase family 2 protein	0	cytosol, vacuole	carbohydrate metabolic process	Mapoly0034s0073.1	0	beta-galactosidase	0	74.7248	0	0	0
ATG8-2.2 enriched	-		Nbv6.1trP30012	60s ribosomal protein l27a-3-like		AT1G70600.1	2e-89	ribosomal protein L18/L15 superfamily protein		cytosolic large ribosomal subunit, membrane, plasmodesma, polysomal ribosome	translation	Mapoly0078s0013.1	1e-83	large subunit ribosomal protein L27Ae		18.2529	0.600173	3.67387	0.403249
ATG8-2.2 enriched	-		Nbv6.1trA1344	60s ribosomal protein l5-like		AT5G39740.2	1e-154	ribosomal protein L5 B		cytosolic large ribosomal subunit, Golgi apparatus, nucleolus, plasma membrane, vacuole	cell proliferation, leaf morphogenesis, ribosomal large subunit assembly, translation	Mapoly0054s0045.1	2e-140	large subunit ribosomal protein L5e		82.002	0	20.8469	0
ATG8-2.2 enriched	-		Nbv6.1trA235897	coatomer subunit alpha-1-like	2	AT1G62020.1	0	Coatomer 2c alpha subunit	2	COPI vesicle coat, cytosol, Golgi membrane, plasma membrane	ER to Golgi vesicle-mediated transport, intra-Golgi vesicle-mediated transport, intracellular protein transport, retrograde vesicle-mediated transport, Golgi to ER	Mapoly0007s0005.1	0	coatomer protein complex	0	782.83	0	0	0
ATG8-2.2 enriched	-		Nbv6.1trP16940	protein root hair defective 3-like		AT3G13870.1	0	root hair defective 3 GTP-binding protein		endoplasmic reticulum membrane, Golgi membrane, integral component of membrane, plasma membrane, vacuolar membrane	actin cytoskeleton organization, cell tip growth, endoplasmic reticulum inheritance, endoplasmic reticulum membrane fusion, ER to Golgi vesicle-mediated transport, plant-type cell wall biogenesis, root epidermal cell differentiation	Mapoly0153s0041.1	0	MSS1/ TRME-related GTP-binding protein		60.1157	0	11.6861	0
ATG8-2.2 enriched	-		Nbv6.1trP41060	e3 ufm1-protein ligase 1 homolog		AT3G46220.1	0	E3 UFM1-protein ligase-like protein		NA	NA	Mapoly0007s0143.1	0	uncharacterized conserved protein		127.829	0	8.88364	0
ATG8-2.2 enriched	-		NbS00032531g0004.1	Eukaryotic translation initiation factor 3 subunit J	1	AT1G66070.2	2e-75	Translation initiation factor eIF3 subunit	0	cytoplasmic part, membrane, protein-containing complex	translational initiation	Mapoly0038s0048.3	9e-55	translation initiation factor 3 subunit J	0	185.406	27.039	84.9278	0.407505
ATG8-2.2 enriched	-		NbS00005975g0012.1	60S ribosomal protein L28	1	AT2G19730.3	3e-70	Ribosomal L28e protein family	0	cell wall, chloroplast, cytosolic large ribosomal subunit, plasma membrane, plasmodesma	response to cytokinin, translation	Mapoly0002s0184.2	2e-54	large subunit ribosomal protein L28e	0	32.86	4.03751	5.41298	0.407505
ATG8-2.2 enriched	-		Nbv6.1trA86604	rab11 family-interacting protein 3 isoform x1		AT4G02880.2	1e-99	ELKS/Rab6-interacting/CAST family protein		NA	NA	Mapoly0005s0053.1	1e-47	unknown		231.613	16.0548	75.5939	0
ATG8-2.2 enriched	-		Nbv6.1trP76357	leucine-rich repeat-containing protein ddb_g0290503	1	AT2G32240.1	0	early endosome antigen	1	NA	NA	Mapoly0001s0335.1	0.0004	E3 ubiquitin ligase involved in syntaxin degradation	0	713.142	0	234.924	0
ATG8-2.2 enriched	-		Nbv6.1trP38704	60s ribosomal protein l5-like		AT5G39740.2	2e-178	ribosomal protein L5 B		cytosolic large ribosomal subunit, Golgi apparatus, nucleolus, plasma membrane, vacuole	cell proliferation, leaf morphogenesis, ribosomal large subunit assembly, translation	Mapoly0054s0045.1	1e-158	large subunit ribosomal protein L5e		95.2817	12.8334	27.1276	5.53119
ATG8-2.2 enriched	-		NbS00000049g0010.1	Plant protein of unknown function DUF827	1	AT5G16730.1	5e-141	weak chloroplast movement under blue light protein	1	NA	NA	Mapoly0004s0133.1	0.91	unknown	0	161.488	0	0	0
ATG8-2.2 enriched	-		Nbv6.1trA143338	sh3 domain-containing protein	1	AT1G29800.1	0	RING/FYVE/PHD-type zinc finger family protein	0	ruffle membrane	regulation of ruffle assembly	Mapoly0037s0060.2	8e-151	SH3YL1 protein	0	100.633	0	0	0
ATG8-2.2 enriched	-		Nbv6.1trA63517	tbc1 domain family member 15-like	3	AT5G52580.1	0	RabGAP/TBC domain-containing protein	1	NA	NA	Mapoly0045s0037.2	0	TBC1 domain family member 15	1	33.9837	0	0	0
ATG8-2.2 enriched	-		Nbv6.1trP74340	dolichyl-diphosphooligosaccharide--protein glycosyltransferase subunit 1a	1	AT1G76400.1	0	Ribophorin I	0	Golgi apparatus, integral component of membrane, oligosaccharyltransferase complex	protein N-linked glycosylation via asparagine	Mapoly0008s0275.1	0	oligosaccharyltransferase complex subunit alpha	1	29.7905	0	7.21478	0
ATG8-2.2 enriched	-		NbS00014666g0005.1	60S ribosomal protein L34	1	AT1G26880.1	2e-72	Ribsomal protein L34e superfamily protein	0	chloroplast, cytosolic large ribosomal subunit, nucleolus	ribosome biogenesis, translation	Mapoly0148s0016.1	3e-60	large subunit ribosomal protein L34e	0	10.4285	0	5.47945	0
ATG8-2.2 enriched	-		Nbv6.1trA45700	eukaryotic translation initiation factor 3 subunit i-like		AT2G46290.1	0	Transducin/WD40 repeat-like superfamily protein		Cul4-RING E3 ubiquitin ligase complex, eukaryotic 43S preinitiation complex, eukaryotic 48S preinitiation complex, eukaryotic translation initiation factor 3 complex, plasmodesma	formation of cytoplasmic translation initiation complex	Mapoly0109s0034.1	0	translation initiation factor 3 subunit I		26.872	0	0	0
ATG8-2.2 enriched	-		Nbv6.1trP13425	rab11 family-interacting protein 3 isoform x1		AT4G02880.1	8e-98	ELKS/Rab6-interacting/CAST family protein		NA	NA	Mapoly0005s0053.1	5e-46	unknown		253.716	20.79	82.6682	0
ATG8-2.2 enriched	-		Nbv6.1trA242429	rab11 family-interacting protein 3 isoform x1		AT4G02880.2	2e-98	ELKS/Rab6-interacting/CAST family protein		NA	NA	Mapoly0005s0053.1	1e-46	unknown		218.088	0	71.772	0
ATG8-2.2 enriched	-		Nbv6.1trA6752	60s ribosomal protein l27a-3-like		AT1G70600.1	4e-87	Ribosomal L28e/L15 superfamily protein		cytosolic large ribosomal subunit, membrane, plasmodesma, polysomal ribosome	translation	Mapoly0033s0117.1	6e-85	large subunit ribosomal protein L27Ae		23.3771	0	0	0
ATG8-2.2 enriched	-		Nbv6.1trP76606	web family protein chloroplastic-like	1	AT5G16730.1	0	weak chloroplast movement under blue light protein	1	NA	NA	Mapoly0004s0133.1	0.72	unknown	0	154.309	0	0	0
ATG8-2.2 enriched	-		Nbv6.1trP19534	coatomer subunit alpha-1-like	2	AT1G62020.1	0	coatomer 2c alpha subunit	2	COPI vesicle coat, cytosol, Golgi membrane, plasma membrane	ER to Golgi vesicle-mediated transport, intra-Golgi vesicle-mediated transport, intracellular protein transport, retrograde vesicle-mediated transport, Golgi to ER	Mapoly0007s0005.1	0	coatomer protein complex	0	903.322	0	329.693	0
ATG8-2.2 enriched	-		NbS00024548g0007.1	B cell receptor associated protein 31 containing protein		AT5G42570.1	7e-94	B-cell receptor-associated 31-like protein		endoplasmic reticulum membrane, integral component of plasma membrane, plasmodesma, vacuolar membrane	ER to Golgi vesicle-mediated transport, protein localization to endoplasmic reticulum exit site	Mapoly0006s0178.1	1e-21	BCR-associated protein, BAP		17.9384	0	4.54531	0
ATG8-2.2 enriched	-		NbS00007177g0022.1	CDK5 regulatory subunit associated protein 3	2	AT5G06830.1	0	hypothetical protein	0	NA	NA	Mapoly0080s0041.1	7e-163	CDK5 regulatory subunit-associated protein 3	1	134.916	0	0	0
ATG8-2.2 enriched	-		Nbv6.1trA203775	coatomer subunit beta -2-like	1	AT1G52360.4	0	coatomer 2c beta subunit	0	COPI vesicle coat, Golgi membrane	ER to Golgi vesicle-mediated transport, intra-Golgi vesicle-mediated transport, intracellular protein transport, retrograde vesicle-mediated transport, Golgi to ER	Mapoly0022s0125.2	0	coatomer beta subunit	0	375.432	0	124.214	0
ATG8-2.2 enriched	-		Nbv6.1trA73825	web family protein chloroplastic-like	1	AT5G16730.1	3e-145	weak chloroplast movement under blue light protein	1	NA	NA	Mapoly0004s0133.1	0.99	unknown	0	153.816	0	0	0
ATG8-2.2 enriched	-		Nbv6.1trA239564	eukaryotic translation initiation factor 3 subunit j-like	1	AT1G66070.2	5e-82	Translation initiation factor eIF3 subunit	0	eukaryotic translation initiation factor 3 complex, membrane, translation preinitiation complex	cytoplasmic translational initiation	Mapoly0038s0048.3	2e-56	translation initiation factor 3 subunit J	0	159.905	34.7321	105.978	0
ATG8-2.2 enriched	-		NbS00028584g0008.1	FG GAP repeat containing protein		AT3G51050.1	0	FG-GAP repeat-containg protein		endoplasmic reticulum, Golgi apparatus, integral component of membrane, vacuolar membrane	root development, unidimensional cell growth	Mapoly0159s0016.1	0	unknown		12.9632	0	0	0
ATG8-2.2 enriched	-		Nbv6.1trP19733	lysophospholipid acyltransferase 1-like		AT1G12640.1	0	MBOAT (membrane bound O-acyl transferase) family		endoplasmic reticulum membrane, integral component of membrane, plasma membrane	galactolipid biosynthetic process, glycerolipid biosynthetic process, phospholipid biosynthetic process	Mapoly0004s0125.1	0	porcupine		13.196	0.600173	5.47945	0
ATG8-2.2 enriched	-		Nbv6.1trA57793	coatomer subunit beta -2-like		AT1G52360.4	0	coatomer 2c beta subunit		COPI vesicle coat, Golgi membrane	ER to Golgi vesicle-mediated transport, intra-Golgi vesicle-mediated transport, intracellular protein transport, retrograde vesicle-mediated transport, Golgi to ER	Mapoly0022s0125.2	0	coatomer beta subunit		484.466	0	207.078	0
ATG8-2.2 enriched	-		NbS00013932g0015.1	Ribosomal protein L18	1	AT3G05590.1	3e-107	ribosomal protein L18	0	chloroplast, cytosolic large ribosomal subunit, Golgi apparatus, plasma membrane, vacuolar membrane	translation	Mapoly0118s0037.1	1e-98	large subunit ribosomal protein L18e	0	25.9119	1.20035	7.21478	1.48168
ATG8-2.2 enriched	-		NbS00008760g0210.1	NbS00008760g0210.1		AT2G34480.2	1e-120	Ribosomal protein L18ae/LX family protein		ribosome	translation	Mapoly0001s0112.1	8e-113	large subunit ribosomal protein L18Ae		68.2442	4.63768	20.1122	2.69994
ATG8-2.2 enriched	-		Nbv6.1trP17352	tbc1 domain family member 15-like	3	AT5G52580.1	0	RabGAP/TBC domain-containing protein	1	NA	NA	Mapoly0045s0037.2	0	TBC1 domain family member 15	1	24.572	0	0	0
ATG8-2.2 enriched	-		Nbv6.1trA188547	mag2-interacting protein 2	5	AT5G24350.3	0	neuroblastoma-amplified sequence protein	0	cytoplasmic part, intracellular membrane-bounded organelle	vacuolar protein processing	Mapoly0143s0007.1	1e-139	secretory pathway protein Sec39	0	13.6615	0	0	0
ATG8-2.2 enriched	-		Nbv6.1trA108027	cysteine protease atg4-like isoform x1	3	AT2G44140.3	7e-172	peptidase family C54 protein (ATG4A)	1	NA	metabolic process	Mapoly0153s0038.1	1e-128	autophagy-related protein 4	1	177.92	1.53931	21.0653	0
ATG8-2.2 enriched	-		Nbv6.1trP35998	web family protein chloroplastic-like	1	AT5G16730.1	8e-146	weak chloroplast movement under blue light protein	1	NA	NA	Mapoly0004s0133.1	1.1	unknown	0	155.326	0	0	0
ATG8-2.2 enriched	-		Nbv6.1trP52462	coatomer subunit alpha-1-like		AT1G62020.1	0	coatomer 2c alpha subunit		COPI vesicle coat, cytosol, Golgi membrane, plasma membrane	ER to Golgi vesicle-mediated transport, intra-Golgi vesicle-mediated transport, intracellular protein transport, retrograde vesicle-mediated transport, Golgi to ER	Mapoly0007s0005.1	0	coatomer protein complex		636.545	0	262.13	0
ATG8-2.2 enriched	-		Nbv6.1trA199742	cysteine protease atg4-like	3	AT2G44140.3	9e-173	peptidase family C54 protein (ATG4A)	1	NA	metabolic process	Mapoly0153s0038.1	1e-127	autophagy-related protein 4	1	185.673	1.53931	29.4363	0
ATG8-2.2 enriched	-		Nbv6.1trA5666	upf0415 protein c7orf25 homolog	3	AT1G73380.1	3e-125	hypothetical protein	0	cellular_component	biological_process	Mapoly0114s0003.2	2e-49	uncharacterized DUF1308	0	144.894	0	0	0
ATG8-2.2 enriched	-		Nbv6.1trP27978	60s ribosomal protein l6-like		AT1G74050.1	4e-112	Ribosomal protein L6 family		ribosome	translation	Mapoly0037s0030.1	3e-100	large subunit ribosomal protein L6e		56.5411	0	0	0
ATG8-2.2 enriched	-		NbS00005851g0011.1	Dolichyl diphosphooligosaccharide protein glycosyltransferase subunit 2	3	AT4G21150.3	0	ribophorin II (RPN2) family protein	0	NA	NA	Mapoly0028s0115.1	4e-164	ribophorin II	0	92.2062	6.26872	35.269	1.21826
ATG8-2.2 enriched	-		NbS00003232g0016.1	Aldehyde dehydrogenase 22A1		AT3G66658.2	0	aldehyde dehydrogenase 22A1		NA	oxidation-reduction process	NbS00003232g0016.1	4e-65	predicted: similar to aldehyde dehydrogenase		15.4017	0	1.73533	0
ATG8-2.2 enriched	-		Nbv6.1trP39071	glycerol-3-phosphate acyltransferase 3		AT5G60620.1	0	glycerol-3-phosphate acyltransferase 9		endoplasmic reticulum membrane, integral component of membrane, plasma membrane	cuticle development, diacylglycerol biosynthetic process, fatty acid biosynthetic process, glycerol-3-phosphate metabolic process, lipid storage, phospholipid biosynthetic process, pollen maturation, seed oilbody biogenesis, triglyceride biosynthetic process	Mapoly0113s0056.1	0	glycerol-3-phosphate O-acyltransferase 3/4		19.362	0	5.47945	0
ATG8-2.2 enriched	-		NbS00031715g0004.1	Ubiquitin modifier activating enzyme atg7		AT5G45900.1	0	ThiF family protein (ATG7)		cytosol, phagophore assembly site	autophagosome assembly, autophagy of mitochondrion, C-terminal protein lipidation, cellular response to nitrogen starvation, defense response to fungus, late nucleophagy, leaf senescence, piecemeal microautophagy of the nucleus, protein transport	Mapoly0015s0071.1	0	autophagy related protein 7		532.187	291.822	206.941	0.333333
ATG8-2.2 enriched	-		Nbv6.1trA212907	coatomer subunit gamma		AT4G34450.1	0	coatomer gamma-2 subunit		chloroplast, COPI vesicle coat, cytosol, endoplasmic reticulum, endoplasmic reticulum-Golgi intermediate compartment, Golgi membrane, plasma membrane, plasmodesma	ER to Golgi vesicle-mediated transport, intra-Golgi vesicle-mediated transport, intracellular protein transport, organelle transport along microtubule, protein secretion	Mapoly0005s0083.1	0	coatomer subunit gamma		140.85	18.5995	50.6591	5.59337
ATG8-2.2 enriched	-		Nbv6.1trP4365	60s ribosomal protein l23a	1	AT3G55280.2	2e-68	ribosomal protein L23AB	1	cytosolic large ribosomal subunit, Golgi apparatus, membrane, polysomal ribosome	response to cold, response to high light intensity, response to oxidative stress, ribosomal large subunit assembly, translation	Mapoly0028s0094.1	9e-64	large subunit ribosomal protein L23Ae	1	55.2955	3.2191	14.3593	2.03753
ATG8-2.2 enriched	-		Nbv6.1trP4996	premnaspirodiene oxygenase-like		AT3G26310.1	4e-135	cytochrome P450 2C family		NA	NA	Mapoly0025s0014.1	5e-103	flavonoid 3'monooxygenase		12.7977	0	0	0
ATG8-2.2 enriched	-		NbS00002504g0003.1	Ribosomal protein L30		AT1G36240.1	3e-68	ribosomal protein L7Ae/L30e/S12e/gadd45 family protein		cytosolic large ribosomal subunit	translation	Mapoly0099s0042.1	2e-67	large subunit ribosomal protein L30e		23.9264	0	1.87206	0
ATG8-2.2 enriched	-		NbS00038062g0006.1	Eukaryotic translation initiation factor 3 subunit 4		AT3G11400.1	8e-158	eukaryotic translation initiation factor 3G1		eukaryotic 43S preinitiation complex, eukaryotic 48S preinitiation complex, eukaryotic translation initiation factor 3 complex	formation of cytoplasmic translation initiation complex	Mapoly0059s0037.1	2e-106	translation initiation factor 3 subunit G		10.8267	0	0	0
ATG8-2.2 enriched	-		Nbv6.1trP61511	60s ribosomal protein l3	1	AT1G61580.1	0	R-protein L3 B	1	cytosolic large ribosomal subunit, membrane	ribosomal large subunit assembly, translation	Mapoly0001s0237.1	0	large subunit ribosomal protein L3e	1	122.363	9.15464	42.8312	4.40413
ATG8-2.2 enriched	-		NbS00040601g0015.1	Glycerol 3 phosphate acyltransferase 4		AT1G01610.1	0	glycerol-3-phosphate acyltransferase 4		integral component of membrane	cutin biosynthetic process, dephosphorylation, phospholipid biosynthetic process	Mapoly0046s0032.1	0	glycerol-3-phosphate acyltransferase		60.3736	1.20035	13.8278	0
ATG8-2.2 enriched	-		NbS00010425g0009.1	plastid transcriptionally active 5		AT4G13670.1	5e-122	plastid transcriptionally active 5		NA	NA	Mapoly0004s0042.1	3e-65	putative peptidoglycan binding domain		21.1694	0	0	0
ATG8-2.2 enriched	-		Nbv6.1trA22057	probable ribose-5-phosphate isomerase chloroplastic		AT5G44520.2	9e-106	NagB/RpiA/CoA transferase-like superfamily protein		NA	NA	Mapoly0213s0005.1	5e-32	ribose-5-phosphate isomerase		13.2652	0	0	0
ATG8-2.2 enriched	-		Nbv6.1trP19476	transmembrane protein 33 homolog	1	AT3G02420.1	0	dihydroflavonol 4-reductase/flavanone protein	0	NA	NA	Mapoly0013s0171.1	3e-108	uncharacterized protein family (UPF0121)	1	28.7486	0.600173	13.6986	0
ATG8-2.2 enriched	-		Nbv6.1trA141068	60s ribosomal protein l11	1	AT5G45775.2	7e-128	Ribsomal L5P family protein	1	cytosolic large ribosomal subunit, Golgi apparatus, membrane, nucleus, vacuole	ribosomal large subunit assembly, translation	Mapoly0038s0097.1	2e-124	60s ribosomal protein L11-related	1	35.615	3.38859	8.29322	1.63002
ATG8-2.2 enriched	-		NbS00049696g0008.1	Ribosomal protein L15		AT4G16720.1	7e-124	ribosomal protein L23/L15e family protein		cytosolic large ribosomal subunit, Golgi apparatus, plasma membrane, polysomal ribosome, vacuolar membrane	cytoplasmic translation	Mapoly0043s0043.1	5e-127	large subunit ribosomal protein L15e		26.0629	1.20035	8.15649	1.95484
ATG8-2.2 enriched	-		Nbv6.1trA8540	probable manganese-transporting atpase pdr2	1	AT5G23630.1	0	phosphate deficiency response 2	0	integral component of membrane	cation transport	Mapoly0002s0327.1	0	ATPase	0	48.354	0	0	0
ATG8-2.2 enriched	-		Nbv6.1trA75455	60s ribosomal protein l14-1		AT2G20450.1	2e-77	Ribosomal protein L14		cytosolic large ribosomal subunit, endoplasmic reticulum, Golgi apparatus, plasmodesma, vacuole	ribosomal large subunit biogenesis, translation	Mapoly0030s0040.1	2e-72	large subunit ribosomal protein L14e		29.7634	0	0	0
ATG8-2.2 enriched	-		NbS00023298g0013.1	beta ketoacyl reductase 1		AT1G67730.1	9e-169	beta-ketoacyl reductase 1		endoplasmic reticulum membrane, integral component of membrane	embryo development ending in seed dormancy, oxidation-reduction process, very long-chain fatty acid biosynthetic process	Mapoly0014s0112.1	2e-136	17 beta-hydroxysteroid		13.0304	0	0	0
ATG8-2.2 enriched	-		NbS00036341g0012.1	Coatomer protein epsilon subunit	2	AT1G30630.1	1e-180	Coatomer epsilon subunit	1	COPI vesicle coat, cytosol, Golgi membrane, vacuolar membrane	ER to Golgi vesicle-mediated transport, intra-Golgi vesicle-mediated transport, protein transport, retrograde vesicle-mediated transport, Golgi to ER	Mapoly0002s0056.1	5e-146	coatomer subunit epsilon	2	109.22	5.11713	22.5823	3.98386
ATG8-2.2 enriched	-		NbS00062043g0007.1	Ascorbate peroxidase		AT4G35000.1	6e-169	ascorbate peroxidase		chloroplast envelope, cytosol, glyoxysomal membrane, Golgi apparatus, integral component of membrane, mitochondrion, plasmodesma, vacuolar membrane	cellular oxidant detoxification, cellular response to oxidative stress, hydrogen peroxide catabolic process, oxidation-reduction process, response to cytokinin, response to reactive oxygen species	Mapoly0015s0180.2	8e-132	L-ascorbate peroxidase		26.2264	0	9.16088	0
ATG8-2.2 enriched	-		Nbv6.1trA202660	60s ribosomal protein l4-1-like		AT3G09630.1	0	Ribosomal protein L4/L1 family		ribosome	translation	Mapoly0116s0033.3	0	large subunit ribosomal protein L4e		186.742	0	96.8608	0
ATG8-2.2 enriched	-		NbS00016433g0002.1	Squalene synthase		AT4G34640.1	0	squalene synthase		integral component of membrane	ergosterol biosynthetic process	Mapoly0098s0008.1	0	squalene synthase		12.3322	0	0	0
ATG8-2.2 enriched	-		NbS00009111g0021.1	60 ribosomal protein L14		AT2G20450.1	2e-78	Ribosomal protein L14		cytosolic large ribosomal subunit, endoplasmic reticulum, Golgi apparatus, plasmodesma, vacuole	ribosomal large subunit biogenesis, translation	Mapoly0030s0040.1	6e-71	large subunit ribosomal protein L14e		30.4762	0	5.41298	0
ATG8-2.2 enriched	-		Nbv6.1trA12125	calcium-transporting atpase endoplasmic reticulum-type-like	1	AT1G07670.2	0	endomembrane-type CA-ATPase	0	NA	NA	Mapoly0013s0119.3	0	calcium-transporting ATPase	0	70.171	0	28.5422	0
ATG8-2.2 enriched	-		NbS00036753g0005.1	Fructokinase protein 1		AT3G54090.1	0	fructokinase-like 1		chloroplast nucleoid, nucleus	carbohydrate phosphorylation, chloroplast organization, plastid transcription	Mapoly0051s0110.1	2e-159	sugare kinase		12.7977	0	1.73533	0
ATG8-2.2 enriched	-		Nbv6.1trA113674	er membrane protein complex subunit 10		AT1G65270.3	1e-125	ER membrane protein complex subunit-like protein		NA	NA	Mapoly0069s0067.1	7e-66	uncharacterized conserved protein		10.5794	0	0	0
ATG8-2.2 enriched	-		Nbv6.1trP42422	60s ribosomal protein l13-1-like		AT3G49010.7	2e-122	breast basic conserved 1		cell wall, cytosolic large ribosomal subunit, Golgi apparatus, nucleolus, plasma membrane, plasmodesma, polysomal ribosome, vacuolar membrane	response to cytokinin, translation	Mapoly0055s0071.1	3e-106	large subunit ribosomal protein L13e		74.167	1.20035	24.6575	2.43226
ATG8-2.2 enriched	-		Nbv6.1trA6916	60s ribosomal protein l26-1		AT3G49910.1	1e-94	translation protein SH3-like family protein		chloroplast, cytosolic large ribosomal subunit, Golgi apparatus, nucleolus, plasma membrane, polysomal ribosome, vacuolar membrane	cytoplasmic translation, response to cold, ribosomal large subunit biogenesis	Mapoly0026s0085.1	5e-73	large subunit ribosomal protein L26e		34.3022	0.648926	12.6942	0.407505
ATG8-2.2 enriched	-		Nbv6.1trA211118	nadph--cytochrome p450 reductase		AT4G24520.1	0	P450 reductase		cytosol, endoplasmic reticulum membrane, integral component of membrane	oxidation-reduction process, phenylpropanoid metabolic process, response to abscisic acid, response to oxidative stress	Mapoly0159s0022.1	0	NADPH-hemoprotein reductase		35.8708	0	0	0
ATG8-2.2 enriched	-		Nbv6.1trA64146	myosin-12 isoform x2	4	AT2G31900.4	0	myosin-like protein XIF	0	unconventional myosin complex	actin filament organization, actin filament-based movement	Mapoly0012s0190.1	0	myosin	1	17.4709	0	1.73533	0
ATG8-2.2 enriched	-		NbS00047751g0012.1	Cytochrome b5	1	AT2G32720.1	2e-76	cytochrome B5 isoform B	1	endoplasmic reticulum membrane, integral component of membrane	alkane biosynthetic process, oxidation-reduction process	Mapoly0153s0010.1	5e-66	cytochrome b5	1	15.7979	0	0.867665	0
ATG8-2.2 enriched	-		NbS00003909g0012.1	Reticulon		AT2G46170.1	1e-116	reticulon family protein		endoplasmic reticulum, membrane part, plasma membrane	response to karrikin	Mapoly0035s0106.2	2e-67	reticulon-related (plant)		25.6666	1.2491	8.95012	0
ATG8-2.2 enriched	-		Nbv6.1trA109294	clathrin light chain 1-like		AT2G20760.1	6e-66	clatherin light chain protein		clathrin coat, clathrin-coated pit, cytoplasmic vesicle membrane	transport	Mapoly0075s0069.1	4e-50	clathrin light chain		11.0575	1.20035	1.80181	1.88918
ATG8-2.2 enriched	-		Nbv6.1trA177800	60s ribosomal protein l35-like		AT5G02610.1	1e-73	Ribosomal L29 family protein		cytosolic large ribosomal subunit	maturation of LSU-rR from tricistronic rR transcript (SSU-rR5.8S rRLSU-rR), translation	Mapoly0097s0080.1	9e-68	large subunit ribsomal protein L35e		20.2951	0	7.35152	0
ATG8-2.2 enriched	-		NbS00015607g0008.1	50S ribosomal protein L2		AT4G36130.1	2e-145	Ribosomal protein L2 family		cytosolic large ribosomal subunit, plasma membrane, polysomal ribosome, vacuole	cytoplasmic translation	Mapoly0068s0027.1	4e-140	large subunit ribosomal protein L8e		98.0116	6.177	27.9288	1.40751
ATG8-2.2 enriched	-		NbS00021061g0110.1	NbS00021061g0110.1	1	AT3G05590.1	7e-114	ribosomal protein L18	1	chloroplast, cytosolic large ribosomal subunit, Golgi apparatus, plasma membrane, vacuolar membrane	translation	Mapoly0118s0037.1	1e-105	large subunit ribosomal protein L18e	0	34.0383	0.648926	14.3631	0.403249
ATG8-2.2 enriched	-		NbS00005958g0009.1	plastid transcriptionally active 12		AT2G34640.1	0	plastid transcriptionally active 12		chloroplast, nucleus, plastid chromosome, plastid-encoded plastid R polymerase complex	plastid transcription, positive regulation of red or far-red light signaling pathway, positive regulation of transcription, D-templated, response to blue light, response to far red light, response to red light	Mapoly0061s0053.1	1e-86	uknown		14.0743	0.648926	1.87584	0
ATG8-2.2 enriched	-		Nbv6.1trA74221	dolichyl-diphosphooligosaccharide--protein glycosyltransferase subunit 2-like	3	AT4G21150.3	0	ribophorin II (RPN2) family protein	0	NA	NA	Mapoly0028s0115.1	0	ribophorin II	0	91.6695	0	39.0795	0
ATG8-2.2 enriched	-		Nbv6.1trA99313	2-oxoglutarate and fe -dependent oxygenase superfamily protein isoform 1		AT2G17970.1	0	2-oxoglutarate (2OG) and Fe(II)-dependent oxygenase		P-body, plasmodesma	demethylation, mR catabolic process	Mapoly0001s0483.1	2e-128	uncharacterized conserved protein		11.372	0	0	0
ATG8-2.2 enriched	-		NbS00059392g0001.1	Ribosomal protein L26 1		AT3G49910.1	6e-93	translation protein SH3-like family protein		chloroplast, cytosolic large ribosomal subunit, Golgi apparatus, nucleolus, plasma membrane, polysomal ribosome, vacuolar membrane	cytoplasmic translation, response to cold, ribosomal large subunit biogenesis	Mapoly0026s0085.1	2e-75	large subunit ribosomal protein L26e		34.7532	0.648926	15.4264	0
ATG8-2.2 enriched	-		Nbv6.1trP47320	dolichyl-diphosphooligosaccharide--protein glycosyltransferase 48 kda subunit	1	AT5G66680.1	0	dolichyl-diphosphooligosaccharide-protein glycosyltransferase	1	Golgi apparatus, integral component of membrane, nucleolus, oligosaccharyltransferase complex, plant-type cell wall, plasmodesma, vacuolar membrane	cellulose biosynthetic process, plant-type cell wall organization, protein N-linked glycosylation via asparagine, unidimensional cell growth	Mapoly0103s0006.1	0	oligosaccharyltransferase complex subunit beta	1	46.2175	4.03751	12.8823	0
ATG8-2.2 enriched	-		NbS00029456g0001.1	60S ribosomal protein L12		AT5G60670.1	2e-105	Ribosomal protein L11 family protein		cytosolic large ribosomal subunit, Golgi apparatus	ribosomal large subunit assembly, translation	Mapoly0007s0191.1	4e-108	large subunit ribosomal protein L12e		25.6666	8.07502	12.8348	3.90968
ATG8-2.2 enriched	-		Nbv6.1trA261157	transmembrane protein 214	2	AT1G70770.2	0	transmembrane protein	0	NA	NA	Mapoly0031s0122.1	8e-126	uncharacterized conserved protein	0	68.1835	9.51335	36.3436	0
ATG8-2.2 enriched	-		NbS00002272g0002.1	cinnamate 4 hydroxylase		AT2G30490.1	0	cinnamate-4-hydroxylase		endoplasmic reticulum, Golgi apparatus, integral component of membrane, plant-type cell wall, plasma membrane, plasmodesma, vacuolar membrane	lignin metabolic process, oxidation-reduction process, pollen development, response to karrikin, ubiquinone biosynthetic process	Mapoly0163s0018.1	0	trans-cinnamate 4-monooxygenase		60.9189	0.648926	17.2985	0
ATG8-2.2 enriched	-		NbS00031957g0003.1	Hydrolase alpha/beta fold	2	AT2G36290.1	3e-141	alpha/beta-Hydrolases superfamily protein	0	NA	NA	Mapoly0005s0202.1	2e-100	alpha/beta hydrolase fold-containing protein	0	12.6467	0	0	0
ATG8-2.2 enriched	-		Nbv6.1trA114336	60s ribosomal protein l6-like		AT1G74050.1	3e-110	ribosomal protein L6 family protein		ribosome	translation	Mapoly0037s0030.1	2e-102	large subunit ribosomal protein L6e		56.5411	1.84927	21.5779	0
ATG8-2.2 enriched	-		Nbv6.1trA57621	60s ribosomal protein l6-like		AT1G74060.1	7e-113	Ribosomal protein L6 family protein		ribosome	translation	Mapoly0037s0030.1	6e-101	large subunit ribosomal protein L6e		59.4596	0	21.5779	1.14409
ATG8-2.2 enriched	-		Nbv6.1trA131517	pentatricopeptide repeat superfamily isoform 1	1	AT3G49140.1	1e-113	Pentatricopeptide repeat (PPR) superfamily protein	1	NA	NA	Mapoly0002s0015.1	5e-32	CREG1 protein	0	43.911	0	0	0
ATG8-2.2 enriched	-		NbS00022260g0005.1	60S ribosomal protein L21 protein	1	AT1G57860.1	4e-103	translation protein SH3-like family protein	1	cytosolic large ribosomal subunit	translation	Mapoly0052s0065.1	1e-89	large subunit ribsomal protein L21e	1	25.5868	0	1.73533	0
ATG8-2.2 enriched	-		NbS00028901g0010.1	Calcium binding protein		AT5G08580.2	6e-179	Calcium-binding EF hand protein		NA	NA	Mapoly0097s0037.1	1e-05	EF-hand calcium-binding domain containing protein		12.0994	0	0	0
ATG8-2.2 enriched	-		Nbv6.1trA227595	mitochondrial outer membrane protein porin of 36 kda	1	AT3G01280.1	3e-143	voltage dependent anion channel 1	0	chloroplast envelope, Golgi apparatus, mitochondrial outer membrane, plasma membrane, pore complex, vacuolar membrane	anion transmembrane transport, defense response, inorganic anion transport, response to bacterium	Mapoly0001s0240.1	1e-111	voltage-dependent anion channel protein 1	0	13.7433	0.600173	5.41298	0
ATG8-2.2 enriched	-		Nbv6.1trA113800	dolichyl-diphosphooligosaccharide--protein glycosyltransferase 48 kda subunit	1	AT5G66680.1	0	dolichyl-diphosphooligosaccharide-protein glycosyltransferase	1	Golgi apparatus, integral component of membrane, nucleolus, oligosaccharyltransferase complex, plant-type cell wall, plasmodesma, vacuolar membrane	cellulose biosynthetic process, plant-type cell wall organization, protein N-linked glycosylation via asparagine, unidimensional cell growth	Mapoly0103s0006.1	0	oligosaccharyltransferase complex subunit beta	1	54.5767	1.20035	23.9115	0
ATG8-4 enriched		+	Nbv6.1trP30916	lecithin-cholesterol acyltransferase-like 4	2	AT4G19860.1	0	alpha/beta-Hydrolases superfamily protein	1	cytosol	phospholipid catabolic process	Mapoly0131s0029.1	0	lecithine cholesterol acyltransferase-related	0	14.0598	61.2894	86.549	0
ATG8-4 enriched		+	Nbv6.1trA62456	40s ribosomal protein s3-3-like		AT2G31610.1	2e-145	Ribosomal protein S3 family protein		chloroplast, cytosolic small ribosomal subunit, Golgi apparatus, nucleus, plasmodesma, vacuolar membrane	positive regulation of D repair, response to salt stress, translation	Mapoly0001s0014.1	4e-153	small subunit ribosomal protein S3e		0.945578	6.05627	10.021	1.88067
ATG8-4 enriched		+	NbS00050269g0002.1	WD 40 repeat protein		AT5G50230.1	0	Transducin/WD40 repeat-like superfamily protein		autophagosome membrane	autophagosome assembly, protein transport	Mapoly0102s0055.1	0	Autophagy protein 16-like		0.001	35.4704	43.5546	0
ATG8-4 enriched		-	Nbv6.1trA214512	14-3-3-like protein gf14 kappa		AT5G65430.1	7e-151	general regulatory factor 8		cytoplasm, nucleus	regulation of metabolic process, response to freezing	Mapoly0043s0019.1	3e-134	14-3-3 protein epsilon		0	9.61434	0	0
ATG8-4 enriched		-	NbS00017213g0030.1	NADP dependent D sorbitol 6 phosphate dehydrogenase	1	AT2G21250.1	0	NAD (P)-linked oxidoreductase superfamily protein	1	cytosol	oxidation-reduction process, response to cadmium ion	Mapoly0086s0056.3	4e-161	aldose-6-phosphate reductase	1	0.001	118.768	0	0
ATG8-4 enriched		+	Nbv6.1trA143295	vesicle-associated membrane protein 727	1	AT3G54300.3	7e-155	vesicle-associated membrane protein 727 (VAMP727)	0	CORVET complex, early endosome membrane, integral component of membrane, SRE complex	exocytosis, protein targeting to vacuole, vacuole organization, vesicle fusion	Mapoly0076s0053.1	2e-110	vesicle-associated membrane protein 72	0	0.001	9.44485	11.7601	0
ATG8-2.2 enriched	+		NbS00028552g0005.1	Rhodanese related sulfurtransferase		AT4G01050.1	2e-162	thylakoid rhodanese-like protein		NA	NA	Mapoly0027s0106.1	3e-88	chitinase		14.9361	0	39.4233	0
ATG8-2.2 enriched	+		Nbv6.1trA216541	mannose-1-phosphate guanyltransferase alpha-b-like	1	AT1G74910.2	0	ADP-glucose pyrophosphorylase family protein	1	NA	biosynthetic process	Mapoly0163s0013.4	0	SUGAR-1-PHOSPHATE GUANYL TRANSFERASE	0	48.2762	12.448	65.4875	3.7656
ATG8-2.2 enriched	+		Nbv6.1trP56805	60s ribosomal protein l21-1-like	1	AT1G09690.1	1e-102	Translation protein SH3-like family protein	1	chloroplast, cytosolic large ribosomal subunit, nucleolus	translation	Mapoly0052s0065.1	1e-89	large subunit ribosomal protein L21e	1	38.1392	0	8.29322	0
ATG8-2.2 enriched	+		Nbv6.1trA147492	brefeldin a-inhibited guanine nucleotide-exchange protein 5	2	AT3G43300.3	0	HOPM interactor 7 (AtMIN7)	0	cytosol, early endosome membrane, trans-Golgi network	defense response to bacterium, endocytosis, innate immune response, protein transport, regulation of ARF protein signal transduction, viral process	Mapoly0003s0171.4	0	guanine nucleotide-exchange factor	0	16.0453	0	4.54531	0
ATG8-2.2 enriched	+		NbS00008738g0001.1	Fatty acid elongase 3 ketoacyl CoA synthase		AT1G07720.2	0	3-ketoacyl-CoA synthase		integral component of membrane	fatty acid biosynthetic process	Mapoly0055s0025.1	5e-103	FAE1/ Type III polyketide synthase-like protein		30.4196	0	15.2972	0
ATG8-2.2 enriched	+		Nbv6.1trA264276	nadh--cytochrome b5 reductase 1	1	AT5G17770.1	5e-175	NADH:cytochrome B5 reductase	0	endoplasmic reticulum, integral component of membrane, mitochondrial outer membrane, plant-type cell wall, plasma membrane	electron transport chain	Mapoly0013s0176.1	2e-129	cytochrome-b5 reductase	0	29.1304	0	6.48763	0
ATG8-2.2 enriched	+		Nbv6.1trP4964	isoflavone 2 -hydroxylase-like		AT4G37370.1	5e-169	cytochrome P450 2C family		NA	NA	Mapoly0025s0014.1	8e-96	flavonoid 3'monooxygenase		160.415	9.61434	96.1998	1.21826
ATG8-2.2 enriched	+		Nbv6.1trA86334	ethylene-insensitive protein 2	3	AT5G03280.1	0	NRAMP metal ion transporter family protein	1	cytoplasm, intracellular membrane-bounded organelle, membrane	auxin polar transport, cell division, cellular response to iron ion, defense response by callose deposition in cell wall, defense response to bacterium, defense response to fungus, establishment of planar polarity, jasmonic acid and ethylene-dependent systemic resistance, ethylene mediated signaling pathway, leaf senescence, metal ion transport, negative regulation of defense response, phloem or …	Mapoly0001s0226.1	7e-93	ehtylene-insensitive protein 2	1	18.4185	0	8.08245	0
ATG8-2.2 enriched	+		NbS00008926g0010.1	Vacuolar protein sorting associated protein 4B	1	AT2G27600.1	0	AAA-type ATPase family protein	0	multivesicular body membrane, nucleus, plasmodesma	cell cycle, endosome organization, potassium ion homeostasis, protein transport, sodium ion homeostasis, trichome branching, vacuole organization, vesicle-mediated transport	Mapoly0064s0038.1	0	vacuolar protein-sorting-associated protein 4	1	12.7997	1.29785	7.28504	0
ATG8-2.2 enriched	+		Nbv6.1trP59491	nadph--cytochrome p450 reductase		AT4G24520.1	0	P450 reductase		cytosol, endoplasmic reticulum membrane, integral component of membrane	oxidation-reduction process, phenylpropanoid metabolic process, response to abscisic acid, response to oxidative stress	Mapoly0159s0022.1	0	NADPH-hemoprotein reductase		29.472	0	5.54215	0
ATG8-2.2 enriched	+		Nbv6.1trA177743	auxin-binding protein abp19a-like		AT5G20630.1	4e-92	germin 3		apoplast, extracellular matrix, nucleus, plant-type cell wall	response to cold, response to cytokinin	Mapoly0028s0003.1	4e-42	Cpin, nutrient reservoir activity		30.3378	12.3737	20.9837	5.39562
ATG8-2.2 enriched	+		NbS00021769g0023.1	Nicalin	2	AT3G44330.1	0	M28 Zn-peptidase nicastrin	2	endoplasmic reticulum membrane, Golgi apparatus, integral component of membrane, mitochondrion, plasma membrane, plasmodesma, vacuolar membrane	protein processing, regulation of signal transduction	Mapoly0185s0020.1	0	predicted aminopeptidases - M20/M25/M40 family	0	31.6817	0.600173	18.9824	0
ATG8-2.2 enriched	+		NbS00036485g0008.1	60S ribosomal protein L17		AT1G27400.1	3e-111	Ribosomal protein L22p/L17e family protein		chloroplast, cytosolic large ribosomal subunit, Golgi apparatus, plasma membrane, plasmodesma, vacuolar membrane	cytoplasmic translation	Mapoly0014s0203.2	2e-108	large subunit ribosomal protein L17e		31.2201	0	9.95073	0
ATG8-2.2 enriched	+		Nbv6.1trA100080	probable uncharacterized protein At5g49945-like		AT4G24330.1	0	hypothetical protein (DUF1682)		NA	NA	Mapoly0037s0012.1	1e-149	adipocyte-specific protein 4-related		32.9543	1.20035	16.3016	0
ATG8-2.2 enriched	+		Nbv6.1trA70802	coatomer subunit beta-1-like		AT4G31480.9	0	coatomer 2C beta subunit		COPI vesicle coat, cytosol, Golgi membrane, plasmodesma	ER to Golgi vesicle-mediated transport, intra-Golgi vesicle-mediated transport, intracellular protein transport	Mapoly0086s0049.1	0	coatomer subunit beta		48.9725	1.89803	27.1314	2.42801
ATG8-2.2 enriched	+		NbS00050038g0007.1	Ribosomal protein L10		AT1G26910.1	3e-142	Ribosomal protein L16p/L10e family protein		chloroplast envelope, cytosolic large ribosomal subunit, Golgi apparatus, membrane, nucleus	developmental process, response to UV-B, ribosomal large subunit assembly, translation	Mapoly0020s0158.1	5e-146	large subunit ribosomal protein L10e		47.9531	5.06837	17.2471	3.90968
ATG8-2.2 enriched	+		Nbv6.1trP75120	ribosomal protein s3		ATCG00800.1	1e-140	structural constituent of ribosome		chloroplast envelope, chloroplast stroma, cytosolic small ribosomal subunit, membrane, nucleoid	translation	Mapoly0015s0207.1	4e-28	small subunit ribosomal protein S3		42.4919	15.4291	63.549	3.44077
ATG8-2.2 enriched	+		Nbv6.1trP17332	dolichyl-diphosphooligosaccharide--protein glycosyltransferase subunit 1b	2	AT2G01720.1	0	Ribophorin I	1	endoplasmic reticulum membrane, integral component of membrane	protein glycosylation	Mapoly0008s0275.1	2e-161	oligosaccharyltransferase complex subunit alpha	0	15.5652	0	5.4092	0
ATG8-2.2 enriched	+		Nbv6.1trA159125	60s ribosomal protein l7-2-like	1	AT3G13580.9	8e-157	Ribosomal protein L30/L7 family protein	1	chloroplast, cytosolic large ribosomal subunit, membrane, polysomal ribosome	maturation of LSU-rR from tricistronic rR transcript (SSU-rR5.8S rRLSU-rR)	Mapoly0050s0096.1	8e-138	large subunit ribosomal protein L7e	0	77.4672	3.81927	37.4409	4.0708
ATG8-2.2 enriched	+		Nbv6.1trA42882	caax prenyl protease 1 homolog	2	AT4G01320.1	0	Peptidase family M48 family protein	2	integral component of endoplasmic reticulum membrane, vacuole	CAAX-box protein processing	Mapoly0151s0045.1	0	Ste24 endopeptidase	2	17.7854	0	6.34712	0
ATG8-2.2 enriched	+		Nbv6.1trA59280	nodal modulator 1		AT3G62360.2	0	Carbohydrate-binding-like fold		NA	NA	Mapoly0002s0320.1	0	carboxypeptidase regulatory region-containing		30.5139	0	6.48385	0
ATG8-2.2 enriched	+		Nbv6.1trP16938	probable 1-deoxy-d-xylulose-5-phosphate chloroplastic		AT4G15560.1	0	Deoxyxylulose-5-phosphate synthase		chloroplast stroma	1-deoxy-D-xylulose 5-phosphate biosynthetic process, chlorophyll biosynthetic process, isopentenyl diphosphate biosynthetic process, methylerythritol 4-phosphate pathway, terpenoid biosynthetic process, thiamine biosynthetic process	Mapoly0015s0196.1	0	1-deoxy-D-xylulose-5-phosphate synthase		12.6341	0	6.48385	0
ATG8-2.2 enriched	+		Nbv6.1trP30388	proton pump-interactor 1-like		AT4G27500.2	3e-159	proton pump interactor 1		cytosol, endoplasmic reticulum membrane, plasma membrane, plasmodesma	regulation of proton transport	Mapoly0003s0069.1	5e-49	uknown		46.9283	0.600173	19.1192	0
ATG8-2.2 enriched	+		Nbv6.1trA164758	transmembrane protein 214	2	AT1G70770.2	0	transmembrane protein	0	NA	NA	Mapoly0031s0122.1	2e-125	uncharacterized conserved protein	0	69.2926	0	41.6199	0
ATG8-2.2 enriched	+		Nbv6.1trA98659	calnexin homolog	1	AT5G61790.1	0	calnexin 1	1	chloroplast, endoplasmic reticulum membrane, Golgi apparatus, integral component of membrane, mitochondrion, plant-type cell wall, plasma membrane, plasmodesma, vacuolar membrane	protein folding	Mapoly0114s0016.1	0	calnexin	0	64.047	9.01416	43.5584	0.740838
ATG8-2.2 enriched	+		Nbv6.1trP51466	probable threonine--trna cytoplasmic	1	AT2G04842.2	0	threonyl-tRNA synthetase 2C	0	chloroplast stroma, mitochondrion	embryo development ending in seed dormancy, threonyl-tR aminoacylation	Mapoly0096s0034.2	0	Threonine-tRNA ligase	1	30.0213	3.43734	15.7112	0.407505
ATG8-2.2 enriched	+		Nbv6.1trA85749	uncharacterized oxidoreductase chloroplastic		AT1G06690.1	0	NAD(P)-linked oxidoreductase superfamily protein		chloroplast envelope, chloroplast thylakoid membrane, plastoglobule	oxidation-reduction process	Mapoly0064s0050.1	2e-152	aldo/keto reductase		20.1421	1.29785	10.0988	0
ATG8-2.2 enriched	+		Nbv6.1trP21647	alpha-l-fucosidase 2	2	AT4G34260.1	0	alpha-L-fucosidase	2	NA	NA	Mapoly0115s0027.2	0	glycosyl hydrolase family 65	0	134.608	0	78.3223	0
ATG8-2.2 enriched	+		Nbv6.1trP48914	elongation factor mitochondrial		AT4G02930.1	0	GTP binding Elongation factor Tu		cell wall, cytosol, mitochondrion	response to cadmium ion, translational elongation	Mapoly0153s0015.1	0	translation factor		38.5586	0	57.4164	0
ATG8-2.2 enriched	+		Nbv6.1trA128302	calnexin homolog	1	AT5G61790.1	0	calnexin 1	1	chloroplast, endoplasmic reticulum membrane, Golgi apparatus, integral component of membrane, mitochondrion, plant-type cell wall, plasma membrane, plasmodesma, vacuolar membrane	protein folding	Mapoly0114s0016.1	0	calnexin	0	85.2857	11.0329	55.2558	0.736583
ATG8-2.2 enriched	+		Nbv6.1trA38007	elongation factor mitochondrial		AT4G02930.1	0	GTP binding Elongation factor Tu		cell wall, cytosol, mitochondrion	response to cadmium ion, translational elongation	Mapoly0153s0015.1	0	translation factor		37.8457	6.8027	55.5406	5.11943
ATG8-2.2 enriched	+		Nbv6.1trA201272	low-temperature-induced cysteine proteinase-like	1	AT5G43060.1	0	Granulin repeat cystein protease family protein	1	cytosol, endoplasmic reticulum, extracellular space, lysosome	proteolysis involved in cellular protein catabolic process, response to salt stress	Mapoly0083s0026.1	4e-170	cysteine protease family C1-related	1	15.7999	0	10.8184	0.736583
ATG8-2.2 enriched	+		Nbv6.1trP5121	glycine--trna ligase chloroplastic mitochondrial isoform x1	3	AT3G48110.1	0	glycine-tRNA ligase	1	cytoplasm	glycyl-tR aminoacylation	Mapoly0186s0003.1	0	glycyl-tRNA synthetase	0	43.5609	0	21.0615	1.22252
ATG8-2.2 enriched	+		NbC26208175g0003.1	Cathepsin B cysteine proteinase	1	AT1G47128.1	0	Granulin repeat cystein protease family protein (RD21)	1	NA	proteolysis	Mapoly0083s0026.1	6e-179	cysteine protease family C1-related	1	14.2233	0	10.9589	0.806498
ATG8-2.2 enriched	+		Nbv6.1trP58182	ribosomal protein l2		ATCG01310.1	0	ribosomal protein L2		chloroplast envelope, chloroplast stroma, membrane, mitochondrial large ribosomal subunit	mitochondrial translation	Mapoly0099s0059.1	1e-25	50s ribosomal protein L2		10.1957	4.68644	7.21478	1.48168
ATG8-2.2 enriched	+		Nbv6.1trA174217	50s ribosomal protein chloroplastic-like		AT1G35680.1	4e-57	Ribosomal protein L21		intracellular, ribosome	translation	Mapoly0034s0066.1	9e-27	50s ribosomal protein L21		7.19343	0	10.9589	1.62576
ATG8-2.2 enriched	+		Nbv6.1trA261159	glucose-1-phosphate adenylyltransferase large subunit chloroplastic amyloplastic	1	AT5G19220.1	0	ADP glucose pyrophosphorylase large subunit	1	chloroplast	glycogen biosynthetic process, starch biosynthetic process	Mapoly0101s0020.1	0	glucose-1-phosphoate adenylyltransferase	0	80.7524	15.6184	106.059	5.23876
ATG8-2.2 enriched	+		Nbv6.1trP45587	clustered mitochondria protein homolog isoform x1	1	AT1G01320.3	0	tetratricopeptide repeat (TPR)-like superfamily protein	1	NA	NA	Mapoly0060s0041.2	2e-82	eukaryotic translation initiation factor 3	0	55.0859	1.89803	37.0308	0
ATG8-2.2 enriched	+		Nbv6.1trP48334	26s protease regulatory subunit 6a homolog	2	AT3G05530.1	0	regulatory particle triple-A ATPase 5A	2	cytosol, nucleus, proteasome regulatory particle, base subcomplex	embryo sac development, pollen development, positive regulation of proteasomal protein catabolic process, positive regulation of R polymerase II transcriptional preinitiation complex assembly	Mapoly0085s0078.1	0	26S proteasome regulatory subunit T5	2	87.984	14.8232	67.4374	4.23876
ATG8-2.2 enriched	+		Nbv6.1trP32614	delta-1-pyrroline-5-carboxylate synthase-like		AT3G55610.1	0	delta 1-pyrroline-5-carboxylate synthase		chloroplast, membrane	hyperosmotic salinity response, L-proline biosynthetic process, oxidation-reduction process, phosphorylation, pollen development, response to oxidative stress, response to water deprivation, root development	Mapoly0102s0016.2	0	glutamate-5-semialdehyde dehydrogenase		49.3015	7.73605	39.0244	2.83977
ATG8-2.2 enriched	+		NbS00009984g0010.1	Protein transport protein sec31	2	AT3G63460.1	0	transducin/WD40 repeat-like superfamily protein	0	COPII vesicle coat, cytosol, endoplasmic reticulum exit site, Golgi apparatus, plasmodesma	cargo loading into COPII-coated vesicle, intracellular protein transport	Mapoly0156s0008.1	0	protein transport protein SEC31	0	16.9091	0.648926	23.7347	0
ATG8-2.2 enriched	+		NbS00028772g0004.1	Cyclin delta 3		AT4G34090.1	2e-154	cyclin delta-3		NA	NA	Mapoly0032s0004.1	6e-131	unknown		28.1156	1.20035	18.1148	0.403249
ATG8-2.2 enriched	+		Nbv6.1trP74344	mitochondrial outer membrane protein porin of 34 kda		AT3G01280.1	7e-151	voltage dependent anion channel		chloroplast envelope, Golgi apparatus, mitochondrial outer membrane, plasma membrane, pore complex, vacuolar membrane	anion transmembrane transport, defense response, inorganic anion transport, response to bacterium	Mapoly0001s0240.1	2e-115	voltage-dependent anion channel protein		28.0358	4.63768	19.8539	0
ATG8-2.2 enriched	+		NbS00048541g0015.1	26S protease regulatory subunit		AT1G45000.1	0	AAA-type ATPase family protein		cell wall, cytosolic proteasome complex, nucleolus, plasma membrane, plasmodesma, proteasome regulatory particle, base subcomplex	positive regulation of R polymerase II transcriptional preinitiation complex assembly, ubiquitin-dependent ERAD pathway	Mapoly0009s0112.3	0	26S proteasome regulatory subunit T4		69.2023	13.7494	84.5629	4.90117
ATG8-2.2 enriched	+		NbS00012584g0001.1	ATP synthase gamma chain chloroplastic		AT4G04640.1	0	ATPase 2C F1 complex 2C gamma subunit protein		chloroplast ATP synthase complex, chloroplast envelope, mitochondrial proton-transporting ATP synthase complex, catalytic core F(1)	ATP hydrolysis coupled cation transmembrane transport, ATP synthesis coupled proton transport, photosynthetic electron transport in photosystem II, regulation of catalytic activity	Mapoly0206s0012.1	0	F-type H+-transporting ATPase subunit gamma		37.0386	8.94219	42.9091	2.35384
ATG8-2.2 enriched	+		Nbv6.1trA203942	pdr-type acb transporter	1	AT1G15520.1	0	pleiotropic drug resistance 12	0	integral component of membrane, plasma membrane	abscisic acid transport, defense response to oomycetes, drug transmembrane transport, lead ion transport, response to ethylene, response to jasmonic acid, response to ozone, response to salicylic acid	Mapoly0021s0156.2	0	ATP-binding cassette transporter	0	112.483	7.66408	95.1252	0
ATG8-2.2 enriched	+		Nbv6.1trA74626	ras-related protein rabe1c-like		AT5G59840.1	5e-144	Ras-related small GTP-binding family protein		cytosol, plasma membrane, plasmodesma	intracellular protein transport, protein secretion, Rab protein signal transduction, regulation of exocytosis, vesicle docking involved in exocytosis	Mapoly0116s0012.1	4e-133	GTP-binding protein SEC4		26.5595	6.177	20.8356	2.02901
ATG8-2.2 enriched	+		Nbv6.1trA114043	cell division protein homolog 2- chloroplastic-like		AT3G52750.3	0	Tubulin/FtsZ family protein		chloroplast stroma, chloroplast thylakoid membrane	chloroplast fission	Mapoly0048s0025.1	0	cell division protein FtsZ-related		54.8366	12.7325	63.6117	0.403249
ATG8-2.2 enriched	+		NbS00006168g0008.1	Protein ASPARTIC PROTEASE IN GUARD CELL 2	1	AT1G01300.1	0	Eukaryotic aspartyl protease family protein	0	membrane, plant-type cell wall	protein catabolic process, proteolysis, response to karrikin	Mapoly0271s0001.1	6e-115	aspartyl protease	0	22.9788	0	26.4669	0
ATG8-2.2 enriched	+		Nbv6.1trP58965	26s protease regulatory subunit 7		AT1G53750.1	0	regulatory particle triple-A ATPase 1A		cytosol, nucleus, plasma membrane, proteasome regulatory particle, base subcomplex	positive regulation of R polymerase II transcriptional preinitiation complex assembly, protein catabolic process	Mapoly0031s0139.1	0	26S proteasome regulatory subunit T1		66.9761	17.0602	76.5281	4.1731
ATG8-2.2 enriched	+		Nbv6.1trP35974	transmembrane protein 120 homolog	1	AT4G10430.3	3e-172	TMPIT-like protein	0	NA	NA	Mapoly0153s0034.3	1e-150	transmembrane protein induced by tumor necrosis	1	10.1119	0	8.14514	0
ATG8-2.2 enriched	+		Nbv6.1trA111126	argininosuccinate chloroplastic		AT4G24830.1	0	arginosuccinate synthase family		chloroplast stroma	arginine biosynthetic process, argininosuccinate metabolic process, urea cycle	Mapoly0038s0028.1	0	argininosuccinate synthase		20.7897	1.80052	18.1737	0.333333
ATG8-2.2 enriched	+		Nbv6.1trP21997	pdr-type acb transporter	1	AT1G15520.1	0	pleiotropic drug resistance 12	0	integral component of membrane, plasma membrane	abscisic acid transport, defense response to oomycetes, drug transmembrane transport, lead ion transport, response to ethylene, response to jasmonic acid, response to ozone, response to salicylic acid	Mapoly0021s0156.2	0	ATP-binding cassette transporter	0	112.084	0	99.7997	0
ATG8-2.2 enriched	+		Nbv6.1trA55014	e3 ubiquitin-protein ligase keg isoform x1	2	AT5G13530.1	0	protein kinase ubiquitin-protein ligase (KEG)	1	early endosome, trans-Golgi network	defense response, developmental growth, endosomal transport, late endosome to vacuole transport, negative regulation of abscisic acid-activated signaling pathway, protein phosphorylation, protein ubiquitination, secretion by cell	Mapoly0002s0111.2	0	protein kinase domain	2	13.827	0	15.2972	0
ATG8-2.2 enriched	+		Nbv6.1trA267408	transducin wd40 repeat-like superfamily protein isoform 2	2	AT3G50590.2	0	transducin/WD40 repeat-like superfamily protein	2	NA	NA	Mapoly0038s0024.1	0	autophagy protein 16-like	2	19.1965	1.20035	20.9172	0
ATG8-2.2 enriched	+		NbS00047628g0009.1	Aldehyde dehydrogenase expressed		AT1G44170.2	0	aldehyde dehydrogenase 3H1		NA	NA	Mapoly0030s0099.1	0	aldehydge dehydrogenase		34.5309	1.84927	37.8833	0.810754
ATG8-2.2 enriched	+		Nbv6.1trA48437	cysteine desulfurase chloroplastic		AT1G08490.1	0	chloroplastic NIFS-like cysteine desulfurase		chloroplast stroma	cysteine metabolic process, iron incorporation into metallo-sulfur cluster, response to selenium ion, selenium compound metabolic process	Mapoly0010s0063.1	0	Selenocysteine lyase		49.9998	7.04416	45.2499	1.613
ATG8-2.2 enriched	+		Nbv6.1trA125101	ras-related protein rabe1c-like		AT5G59840.1	1e-143	Ras-related small GTP-binding family protein		cytosol, plasma membrane, plasmodesma	intracellular protein transport, protein secretion, Rab protein signal transduction, regulation of exocytosis, vesicle docking involved in exocytosis	Mapoly0116s0012.1	3e-131	GTP-binding protein SEC4		23.8717	1.29785	21.9767	1.63002
ATG8-2.2 enriched	+		Nbv6.1trA5196	catalase isozyme 1	1	AT4G35090.1	0	catalase 2	1	chloroplast, cytosolic ribosome, glyoxysome, mitochondrion, stromule	cell death, cell redox homeostasis, cellular oxidant detoxification, cellular response to nitrogen starvation, cellular response to phosphate starvation, cellular response to sulfate starvation, hydrogen peroxide catabolic process, oxidation-reduction process, photoperiodism, response to cold, response to hydrogen peroxide	Mapoly0125s0005.1	0	catalase	0	63.2394	10.384	69.5638	2.0205
ATG8-2.2 enriched	+		Nbv6.1trP48508	protein tic chloroplastic		AT3G46780.1	0	plastid transcriptionally active 16		NA	NA	Mapoly0154s0018.1	3e-75	nitrogen metabolic regulation protein		78.0462	15.6729	71.7833	2.76134
ATG8-2.2 enriched	+		NbS00013115g0003.1	40S ribosomal protein S15a 1	1	AT5G59850.1	7e-88	ribosomal protein S8 family protein	1	cell wall, cytosolic small ribosomal subunit, Golgi apparatus, mitochondrion, plasma membrane, plasmodesma, polysomal ribosome, vacuolar membrane	translation	Mapoly0083s0020.1	1e-78	small subunit ribosomal protein S15Ae	1	13.0304	0	11.8893	1.21826
ATG8-2.2 enriched	+		NbS00021088g0005.1	Glucose 1 phosphate adenylyltransferase small subunit chloroplastic/amyloplastic	2	AT5G48300.1	0	ADP glucose pyrophosphorylase	2	apoplast, chloroplast stroma, heterotetrameric ADPG pyrophosphorylase complex	glycogen biosynthetic process, photoperiodism, flowering, starch biosynthetic process	Mapoly0033s0108.1	0	sugar-1-phosphate guanyl transferase	2	25.0481	9.27537	23.5164	5.67528
ATG8-2.2 enriched	+		Nbv6.1trA1317	acetolactate synthase small subunit chloroplastic-like		AT5G16290.2	0	valine-tolerant 1		acetolactate synthase complex, chloroplast, cytosol, peroxisome	isoleucine biosynthetic process, leucine metabolic process, regulation of catalytic activity, valine biosynthetic process	Mapoly0007s0273.1	4e-165	acetolactate synthatse I/III small subunit		27.7338	2.01876	26.5296	0
ATG8-2.2 enriched	+		Nbv6.1trA221327	pyruvate cytosolic isozyme		AT5G08570.3	0	pyruvate kinase family protein		cytosol	cellular response to insulin stimulus, glycolytic process	Mapoly0023s0129.2	0	pyruvate kinase		35.791	6.53571	33.4196	2.35809
ATG8-2.2 enriched	+		Nbv6.1trP4567	photosystem ii cp43 chlorophyll partial	1	ATCG00280.1	0	photosystem II reactoin center protein C	1	chloroplast stromal thylakoid, chloroplast thylakoid membrane, integral component of membrane, photosystem II reaction center, plastoglobule	photosynthetic electron transport in photosystem II, protein-chromophore linkage	none	NA	NA	0	16.278	1.80052	17.2985	1.40751
ATG8-2.2 enriched	+		NbS00006116g0019.1	Catalase	1	AT4G35090.1	0	catalase 2	1	chloroplast, cytosolic ribosome, glyoxysome, mitochondrion, stromule	cell death, cell redox homeostasis, cellular oxidant detoxification, cellular response to nitrogen starvation, cellular response to phosphate starvation, cellular response to sulfate starvation, hydrogen peroxide catabolic process, oxidation-reduction process, photoperiodism, response to cold, response to hydrogen peroxide	Mapoly0125s0005.1	0	catalase	0	71.2821	11.6331	68.8328	2.83551
ATG8-2.2 enriched	+		Nbv6.1trA1845	cell division cycle protein 48 homolog		AT5G03340.1	0	ATPase 2C AAA-type 2C CDC48 protein		NA	NA	Mapoly0096s0020.2	0	transitional endoplasmic reticulum ATPase		96.6467	10.9552	93.5758	5.67528
ATG8-2.2 enriched	+		Nbv6.1trA1924	translational activator gcn1	4	AT1G64790.1	0	ILITYHIA (ILA)	2	NA	positive regulation of kinase activity, regulation of protein kinase activity, regulation of translation	Mapoly0135s0025.1	0	translational activator GCN1-related	1	119.309	19.8486	115.854	3.7656
ATG8-2.2 enriched	+		Nbv6.1trA11249	bifunctional l-3-cyanoalanine synthase cysteine synthase mitochondrial	1	AT3G61440.1	0	cysteine synthase C1	1	chloroplast, mitochondrion	cyanide catabolic process, cysteine biosynthetic process from serine, detoxification of nitrogen compound, immune response, root hair cell development	Mapoly0008s0245.1	4e-141	cysteine synthase	0	25.2808	4.68644	24.3841	0.806498
ATG8-2.2 enriched	+		Nbv6.1trA1393	protein tic chloroplastic		AT3G46780.1	0	plastid transcriptionally active 16		chloroplast envelope, chloroplast nucleoid, chloroplast thylakoid membrane, plastid chromosome, stromal side of plastid thylakoid membrane	circadian rhythm	Mapoly0154s0018.1	3e-75	nitrogen metabolic regulation protein		70.0601	20.4801	67.9538	4.04952
ATG8-2.2 enriched	+		Nbv6.1trP32384	protein transport protein sec61 subunit alpha-like	1	AT2G34250.3	0	SecY protein transport family protein	1	Golgi apparatus, integral component of membrane, Sec61 translocon complex	posttranslational protein targeting to endoplasmic reticulum membrane, SRP-dependent cotranslational protein targeting to membrane, translocation	Mapoly0026s0118.1	0	protein transport protein SEC61 subunit alpha	1	30.0273	5.23786	28.9294	0
ATG8-2.2 enriched	+		NbS00007460g0008.1	26S proteasome regulatory subunit	3	AT2G32730.1	0	26 proteasome regulatory complex 2C	1	integral component of membrane, proteasome regulatory particle, base subcomplex	regulation of catalytic activity, regulation of protein catabolic process	Mapoly0034s0048.1	0	26S proteasome regulatory subunit N2	1	68.4163	19.2739	69.6265	3.28392
ATG8-2.2 enriched	+		Nbv6.1trA164394	thioredoxin family protein isoform 2		AT5G03880.1	4e-158	Thioredoxin family protein		chloroplast envelope, chloroplast thylakoid membrane	cell redox homeostasis, electron transport chain	Mapoly0060s0005.1	3e-139	glutathione s-transferase, GST		11.2903	0	11.0292	0
ATG8-2.2 enriched	+		Nbv6.1trA116345	26s protease regulatory subunit 6b homolog	1	AT5G58290.1	0	regulatory particle triple-A ATPase 3	1	cell wall, cytosol, membrane, nucleus, plasmodesma, proteasome complex	positive regulation of proteasomal protein catabolic process	Mapoly0008s0139.1	0	26S proteasome regulatory subunit T3	1	74.3391	17.0892	73.3819	5.52268
ATG8-2.2 enriched	+		Nbv6.1trA393	pentatricopeptide repeat-containing protein chloroplastic	1	nexin.1	0	pentatricopeptide repeat (PPR) superfamily protein	1	NA	NA	Mapoly0036s0094.1	4e-117	PPR repeat family	0	39.4349	5.06837	39.1574	0.740838
ATG8-2.2 enriched	+		Nbv6.1trA30804	cell division protein homolog chloroplastic-like	1	AT5G55280.1	0	homolog of bacterial cytokinesis Z-ring protein	1	cell division site, chloroplast stroma, chloroplast thylakoid membrane, microtubule	cell cycle, cell division, chloroplast fission, chloroplast relocation, microtubule-based process, response to blue light	Mapoly0029s0085.1	3e-166	cell division protein FtsZ	0	21.0059	0	20.9172	0
common			Nbv6.1trA11859	autophagy-related protein 3	1	AT5G61500.1	0	autophagy 3 (ATG3)	0	cytosol	autophagy, protein transport	Mapoly0003s0208.1	7e-168	autophagy-related protein 3	0	220.683	113.886	125.707	0
common			Nbv6.1trA36039	autophagy-related protein 3		AT5G61500.1	0	autophagy 3 (ATG3)		cytosol	autophagy, protein transport	Mapoly0003s0208.1	8e-166	autophagy-related protein 3		218.779	111.075	120.877	0
common			Nbv6.1trA59159	autophagy-related protein 3		AT5G61500.1	0	autophagy 3 (ATG3)		cytosol	autophagy, protein transport	Mapoly0003s0208.1	2e-169	autophagy-related protein 3		211.118	119.48	123.233	0
common			Nbv6.1trA190771	autophagy-related protein 3		AT5G61500.1	0	autophagy 3 (ATG3)		cytosol	autophagy, protein transport	Mapoly0003s0208.1	5e-169	autophagy-related protein 3		188.429	104.87	107.869	0
common			NbS00018339g0004.1	uncharacterized protein LOC100242119	2	AT3G57990.1	1e-29	hypothetical protein	0	NA	glucose transmembrane transport	Mapoly0061s0112.1	1e-15	unknown	0	84.9165	63.4428	111.864	0
common			Nbv6.1trA1915	binding isoform 1	2	AT2G22125.1	0	binding protein	1	NA	NA	Mapoly0058s0070.1	0	beta catenin-related armadillo repeat-containing	0	82.4425	8.38498	50.0498	0
common			Nbv6.1trA1915	binding isoform 1	2	AT2G22125.1	0	binding protein	1	NA	NA	Mapoly0058s0070.1	0	beta catenin-related armadillo repeat-containing	0	82.4425	8.38498	50.0498	0
common			Nbv6.1trA56860	probable methionine--trna ligase		AT4G13780.1	0	methionine-tRNA ligase 2C putative		cytosol	methionyl-tR aminoacylation, response to cadmium ion	Mapoly0045s0011.1	0	methionine-tRNA ligase		68.1881	29.9366	20.2527	0
common			Nbv6.1trP48824	3-oxoacyl-		AT5G46290.1	0	3-ketoacyl-acyl carrier protein synthase		chloroplast stroma	fatty acid biosynthetic process	Mapoly0002s0312.1	0	polyketide synthase-related		59.6417	13.5799	67.031	3.15608
common			NbS00017142g0001.1	Isocitrate dehydrogenase	1	AT5G03290.1	0	isocitrate dehydrogenase V	1	NA	NA	Mapoly0002s0215.1	0	isocitrate dehydrogenase	0	54.4929	3.86803	66.1823	1.55159
common			NbS00011570g0012.1	P loop containing nucleoside triphosphate hydrolases		AT1G33970.5	1e-137	P-loop containing nucleoside triphosphate hydrolase		NA	NA	Mapoly0063s0085.1	0.005	GTPase, IMPA family member-related		49.6642	17.7091	67.1678	0
common			NbS00043181g0003.1	ADP ATP carrier protein%2C mitochondrial Fragment	2	AT5G13490.2	0	ADP/ATP carrier 2	1	chloroplast envelope, integral component of membrane, mitochondrial inner membrane, vacuolar membrane	ADP transport, ATP transport, transmembrane transport	Mapoly0117s0032.3	3e-176	solute carrier family 25	1	47.9848	6.98962	37.6063	0
common			Nbv6.1trA103869	26s protease regulatory subunit 8 homolog a	1	AT5G19990.3	0	regulatory particle triple-A ATPase 6A	1	cytosolic proteasome complex, nuclear proteasome complex, plasma membrane, proteasome regulatory particle, base subcomplex	positive regulation of R polymerase II transcriptional preinitiation complex assembly, protein catabolic process	Mapoly0005s0178.1	0	26S proteasome regulatory subunit T6	1	47.9577	8.70073	84.0636	2.62151
common			Nbv6.1trA33291	probable uncharacterized protein LOC104213483		AT3G57990.1	1e-96	hypothetical protein		NA	glucose transmembrane transport	Mapoly0061s0112.1	1e-34	unknown		44.4121	13.689	46.8375	0
common			NbS00004550g0007.1	Myosin XI	1	AT5G20490.2	0	myosin family protein with Dil	0	NA	NA	Mapoly0012s0190.1	0	myosin	0	43.148	1.2491	51.0312	0
common			Nbv6.1trA6306	dna repair atpase-related family protein	1	AT4G31340.1	2e-159	myosin heavy chain-like protein	0	NA	NA	Mapoly0004s0241.1	3e-81	unknown	0	42.2677	0	16.1649	0
common			Nbv6.1trP38618	dnaj homolog mitochondrial-like		AT2G22360.1	0	DNAJ heat shock family protein		chloroplast envelope, chloroplast thylakoid membrane	protein folding, response to heat	Mapoly0020s0120.1	0	molecular chaperone DnaJ		42.1753	15.1877	45.1721	3.57635
common			Nbv6.1trP58673	mannose-1-phosphate guanylyltransferase 1		AT2G39770.3	0	Glucose-1-phosphate adenylyltransferase family protein		cytosol, nucleus	cellulose biosynthetic process, defense response to bacterium, GDP-mannose biosynthetic process, L-ascorbic acid biosynthetic process, response to ammonium ion, response to heat, response to jasmonic acid, response to ozone, response to salt stress	Mapoly0034s0043.1	0	mannose-1-phosphate guanylyltransferase		42.0243	10.2343	52.4534	5.24302
common			NbS00002458g0031.1	Translocation protein SEC63	1	AT1G79940.3	0	DnaJ/ Sec63 Br1 domain-containing protein	0	cytosol, Golgi apparatus, integral component of endoplasmic reticulum membrane, mitochondrion, plasma membrane, Sec62/Sec63 complex	posttranslational protein targeting to membrane, translocation, SRP-dependent cotranslational protein targeting to membrane	Mapoly0090s0076.1	0	translocation protein SEC63	0	40.2421	0.600173	3.60739	0
common			Nbv6.1trA206109	ru large subunit-binding protein subunit chloroplastic		AT3G13470.1	0	TCP-1/cpn60 chaperonin family protein		cytoplasm	protein refolding	Mapoly0001s0499.1	0	rubisco subunit binding-protein beta subunit		31.4324	9.44485	29.5693	4.05377
common			NbS00025777g0007.1	Kinase	2	AT4G29380.1	0	VPS15	0	NA	protein phosphorylation	Mapoly0002s0158.1	0	phosphoinositide-3-kinase, regulatory subunit4	0	30.5851	3.43734	57.1505	0
common			NbS00054590g0004.1	Arginyl tRNA synthetase	1	AT4G26300.5	0	arginyl-tRNA synthetase 2C class Ic	0	cytoplasm	arginyl-tR aminoacylation	Mapoly0066s0109.1	0	arginine-tRNA ligase	0	30.103	1.53931	27.42	0.81501
common			Nbv6.1trA95890	fe-s cluster assembly factor chloroplastic isoform x1	2	AT3G24430.1	0	ATP binding protein	2	chloroplast stroma	iron-sulfur cluster assembly	Mapoly0100s0060.1	0	nucleotide-binding protein NBP35 (yeast)-related	1	29.625	8.82146	17.1142	0
common			Nbv6.1trA59274	nodal modulator 1		AT3G62360.2	0	carbohydrate-binding-like fold		NA	NA	Mapoly0002s0320.1	0	carboxypeptidase regulatory region-containing		29.0882	0	0	0
common			Nbv6.1trA200682	protochlorophyllide reductase-like		AT5G54190.1	0	protochlorophyllide oxidoreductse A		chloroplast envelope, chloroplast thylakoid	chlorophyll biosynthetic process, oxidation-reduction process, photomorphogenesis, photosynthesis, response to ethylene, skotomorphogenesis	Mapoly0030s0118.2	0	protochlorophyllide reductase		27.9666	7.11266	40.8451	3.16885
common			Nbv6.1trP1387	probable mitochondrial chaperone bcs1-b	1	AT3G50930.1	0	cytochrome BC1 synthesis	0	NA	NA	Mapoly0165s0017.1	4e-114	BCS1 AAA-type ATPase	1	27.4991	5.88678	38.2194	0
common			NbS00010171g0006.1	60S ribosomal protein L10a 1		AT1G08360.1	4e-131	ribosomal protein L1p/L10e family		cytosolic large ribosomal subunit, plasma membrane, plasmodesma, polysomal ribosome	maturation of LSU-rRtranslation	Mapoly0006s0264.1	5e-127	large subunit ribosomal protein L10Ae		26.9161	1.41858	8.22296	0.403249
common			Nbv6.1trA191817	pyruvate cytosolic isozyme-like	1	AT3G52990.1	0	pyruvate kinase family protein	1	NA	glycolytic process	Mapoly0074s0068.3	0	pyruvate kinase	1	25.6917	1.2491	13.503	0
common			Nbv6.1trA68003	cellulose synthase a catalytic subunit 1	1	AT4G32410.1	0	cellulose synthase	1	endosome, integral component of membrane, plasma membrane, trans-Golgi network	cell wall organization, cellulose biosynthetic process, hyperosmotic salinity response, plant-type primary cell wall biogenesis	Mapoly0076s0014.1	0	cellulose syntahse (UDP-forming)	0	25.6099	41.19	82.3793	0
common			NbS00030328g0010.1	Transportin 1		AT2G16950.2	0	transportin 1		nucleus	intracellular protein transport	NbS00030328g0010.1	0	transportin-1		23.8677	1.84927	10.6152	0
common			Nbv6.1trA188376	chloroplast stem-loop binding protein of 41 kda chloroplastic	2	AT1G09340.1	0	chloroplast RNA binding protein	2	apoplast, chloroplast envelope, membrane, peroxisome, plasmodesma, plastid-encoded plastid R polymerase complex, plastoglobule, ribosome, stromule, vacuole	cellular response to water deprivation, chloroplast organization, circadian rhythm, defense response to bacterium, monosaccharide metabolic process, plastid translation, polysaccharide catabolic process, positive regulation of transcription, D-templated, positive regulation of translation, response to cold, response to wounding, rR processing	Mapoly0014s0058.1	0	NAD dependent epimerase/ dehydratase	0	23.7714	5.1891	13.6359	3.90543
common			NbS00005969g0104.1	NbS00005969g0104.1		AT1G02560.1	2e-175	nuclear encoded CLP protease 5		chloroplast envelope, chloroplast thylakoid, chloroplastic endopeptidase Clp complex	proteolysis	Mapoly0055s0124.1	2e-139	ATP-dependent CLP protease proteolytic subunit		21.3204	3.26785	31.8912	0
common			Nbv6.1trA120596	serine threonine-protein phosphatase 2a 65 kda regulatory subunit a beta isoform		AT3G25800.3	0	protein phosphatase 2A subunit A2		cytosol, nucleus, peroxisome, plasma membrane, protein phosphatase type 2A complex	regulation of phosphoprotein phosphatase activity, regulation of phosphorylation, response to cadmium ion	Mapoly0107s0027.1	0	serine/threonine-protein phosphatase 2A regulatory subunit A		20.9512	0.600173	12.5651	0.806498
common			Nbv6.1trA49071	atp-dependent clp protease proteolytic subunit-related protein chloroplastic		AT1G09130.3	0	ATP-dependent caseinolytic (Clp) protease/crotonase family protein		chloroplast envelope, chloroplast stroma, mitochondrion, thylakoid	proteolysis	Mapoly0091s0025.1	2e-126	ATP-dependent CLP protease proteolytic subunit		20.6222	1.53931	20.7216	1.62151
common			Nbv6.1trA1373	strictosidine synthase 3	1	AT1G08470.1	0	strictosidine synthase-like 3	0	endoplasmic reticulum, vacuolar membrane	biosynthetic process	Mapoly0164s0010.1	2e-144	strictosidine synthase-related	1	20.3036	0	0	0
common			Nbv6.1trA108645	cellulose synthase a catalytic subunit 3	1	AT5G05170.1	0	cellulose synthase	1	endosome, integral component of membrane, plasma membrane, plasmodesma, trans-Golgi network	cell wall organization, cellulose biosynthetic process, defense response, plant-type primary cell wall biogenesis, plant-type secondary cell wall biogenesis	Mapoly0076s0014.1	0	cellulose syntahse (UDP-forming)	0	20.0749	34.1517	80.3384	0
common			NbS00007615g0209.1	NbS00007615g0209.1		AT2G39770.3	0	glucose-1-phosphate adenylyltransferase family protein		cytosol, nucleus	cellulose biosynthetic process, defense response to bacterium, GDP-mannose biosynthetic process, L-ascorbic acid biosynthetic process, response to ammonium ion, response to heat, response to jasmonic acid, response to ozone, response to salt stress	Mapoly0034s0043.1	0	mannose-1-phosphate guanylyltransferase		19.9093	1.80052	29.6641	0
common			NbS00011906g0010.1	3 oxoacyl		AT1G74960.3	0	fatty acid biosynthesis 1		NA	NA	Mapoly0035s0037.1	0	beta-ketoacyl-[acyl-carrier-protein]		19.8401	0	16.3092	1.47742
common			Nbv6.1trP21340	translocon-associated protein subunit beta	2	AT5G14030.4	5e-78	translocon-associated protein beta (TRAPB) family	0	NA	NA	Mapoly0091s0054.1	5e-47	translocon-associated protein subunit beta	0	19.5928	4.63768	14.5625	0.407505
common			Nbv6.1trA195533	serine threonine-protein phosphatase 2a 65 kda regulatory subunit a beta isoform		AT3G25800.3	0	protein phosphatase 2A subunit A2		cytosol, nucleus, peroxisome, plasma membrane, protein phosphatase type 2A complex	regulation of phosphoprotein phosphatase activity, regulation of phosphorylation, response to cadmium ion	Mapoly0107s0027.1	0	serine/threonine-protein phosphatase 2A regulatory subunit A		19.5256	1.2491	12.6315	0
common			Nbv6.1trA203605	probable -trehalose-phosphate synthase	1	AT1G06410.3	0	trehalose-phosphatase/synthase 7	1	cytosol	dephosphorylation, trehalose biosynthetic process, trehalose metabolism in response to stress	Mapoly0128s0020.1	0	trehalose-phosphatase	0	18.9763	1.84927	28.0731	0
common			Nbv6.1trA81966	3beta-hydroxysteroid-dehydrogenase decarboxylase isoform 2	3	AT2G26260.1	0	3beta-hydroxysteroid-dehydrogenase/decarboxylase isoform 2	1	NA	NA	Mapoly0001s0030.1	0	NAD dependent epimerase/ dehydratase	1	18.88	0	0.93414	0
common			Nbv6.1trA268603	atp sulfurylase chloroplastic-like		AT3G22890.1	0	ATP sulfurylase 1		chloroplast stroma, cytosol, plasma membrane	hydrogen sulfide biosynthetic process, phosphorylation, response to cadmium ion, response to cytokinin, selenium compound metabolic process, sulfate assimilation	Mapoly0142s0006.1	0	sulfate adenylyltransferase		18.88	2.66768	27.2054	0
common			Nbv6.1trA35837	erlin-2-b	2	AT2G03510.1	0	SPFH/Band 7/PHB domain-containing membrane-assocaited	1	endoplasmic reticulum membrane, Golgi apparatus, integral component of membrane, nucleolus, plasmodesma, vacuolar membrane	SREBP signaling pathway, ubiquitin-dependent ERAD pathway	Mapoly0041s0056.2	2e-175	prohibitin-related membrane protease subunits	1	18.729	0	8.35969	0
common			Nbv6.1trP22723	catalase isozyme 1	1	AT4G35090.1	0	catalase 2	1	chloroplast, cytosolic ribosome, glyoxysome, mitochondrion, stromule	cell death, cell redox homeostasis, cellular oxidant detoxification, cellular response to nitrogen starvation, cellular response to phosphate starvation, cellular response to sulfate starvation, hydrogen peroxide catabolic process, oxidation-reduction process, photoperiodism, response to cold, response to hydrogen peroxide	Mapoly0125s0005.1	0	catalase	0	18.7164	4.08626	37.2377	0.806498
common			NbS00053639g0015.1	Ribosomal protein L32		AT4G18100.1	3e-88	ribosomal protein L32e		cytosolic large ribosomal subunit, Golgi apparatus, nucleolus, polysomal ribosome	translation	Mapoly0003s0256.1	2e-70	large subunit ribosomal protein L23e		18.3096	0	1.80559	0
common			NbS00004134g0009.1	Calcium transporting ATPase 1	1	AT1G27770.4	0	autoinhibited Ca2+-ATPase 1	1	chloroplast inner membrane, endoplasmic reticulum, integral component of plasma membrane	ATP hydrolysis coupled cation transmembrane transport, calcium ion transmembrane transport	Mapoly0034s0113.1	0	calcium-transporting ATPase	0	18.0327	0	0	0
common			Nbv6.1trA1421	fructose-bisphosphate aldolase chloroplastic-like		AT4G38970.1	0	fructose-bisphosphate aldolase 2		apoplast, chloroplast envelope, membrane, plastoglobule, thylakoid	gluconeogenesis, glycolytic process, response to abscisic acid, response to cadmium ion	Mapoly0053s0082.1	0	fructose-bisphosphate aldolase		17.9364	12.8334	22.793	3.1117
common			NbS00052354g0005.1	Cleft lip and palate associated transmembrane protein	3	AT5G08500.1	0	Transmembrane CLPTM1 family protein	3	NA	NA	Mapoly0020s0073.1	0	cleft lip and palate associated transmembrane protein-related	2	17.5507	0	0	0
common			Nbv6.1trA125819	cytochrome p450 98a2-like		AT2G40890.1	0	cytochrome P450 2C family		endoplasmic reticulum, integral component of membrane, mitochondrion, plasma membrane	coumarin biosynthetic process, flavonoid biosynthetic process, lignin biosynthetic process, oxidation-reduction process	Mapoly0037s0087.1	0	coumaroylquinate(coumaroylshikimate) 3-monooxygenase		17.3726	0	0	0
common			NbS00019858g0012.1	Long chain fatty acid CoA ligase 3	1	AT2G04350.2	0	AMP-dependent synthetase and ligase family protein	1	chloroplast envelope, endoplasmic reticulum, Golgi apparatus	long-chain fatty acid metabolic process	Mapoly0002s0259.1	0	acyl-CoA synthetase	1	16.9888	0	1.73533	0
common			NbS00046742g0003.1	Phospho 2 dehydro 3 deoxyheptonate aldolase 2 chloroplastic		AT4G39980.1	0	3-deoxy-D-arabino-heptulosonate 7-phosphate synthase		chloroplast	aromatic amino acid family biosynthetic process, chorismate biosynthetic process	Mapoly0008s0188.1	0	3-deoxy-7-phosphoheptulonate synthase		16.9763	8.07502	12.8348	2.01625
common			Nbv6.1trA272945	trab domain-containing protein		AT1G05270.1	4e-151	TraB family protein		NA	NA	Mapoly0043s0066.1	5e-28	gb def: hypothetical protein At2g32340		16.8945	0	24.3992	0
common			Nbv6.1trA44984	uncharacterized membrane protein at1g75140-like	3	AT1G75140.1	0	membrane protein	1	NA	NA	Mapoly0094s0054.2	2e-103	Sec31-related protein	0	16.6723	0	0	0
common			Nbv6.1trP70104	v-type proton atpase subunit b2		AT4G38510.5	0	ATPase 2C subunit B protein		chloroplast envelope, Golgi apparatus, proton-transporting V-type ATPase, V1 domain, vacuolar membrane	actin filament bundle assembly, actin filament capping, ATP hydrolysis coupled proton transport, ATP metabolic process	Mapoly0093s0019.1	0	v-type H+-transporting ATPase subunit B		16.278	1.53931	13.5695	0
common			Nbv6.1trA1123	magnesium-protoporphyrin ix monomethyl ester	1	AT3G56940.1	0	dicarboxylate diiron protein 2C	1	chloroplast inner membrane, chloroplast thylakoid membrane	chlorophyll biosynthetic process, chloroplast organization, oxidation-reduction process, photosynthesis, regulation of tetrapyrrole metabolic process	Mapoly0124s0017.1	0	magnesium-protoporphyrin IX monomehtyl ester cyclase	1	15.9635	4.73519	29.0737	0.333333
common			Nbv6.1trP44911	rna polymerase beta subunit		ATCG00190.1	4e-161	RNA polymerase subunit beta		NA	NA	Mapoly0091s0005.1	7e-120	DNA-directed RNA polymerase subunit beta		15.8797	0	10.826	0
common			NRB1-a	added_for_Tolga		NA	NA	NA		NA	NA	NA	NA	NA		15.4834	0.648926	20.714	0
common			Nbv6.1trP37282	3-ketoacyl- synthase 6	2	AT1G68530.1	0	3-ketoacyl-acyl carrier protein synthase 6	2	endoplasmic reticulum membrane, integral component of membrane	fatty acid biosynthetic process, response to cold, response to light stimulus, unidimensional cell growth, wax biosynthetic process	Mapoly0005s0001.1	0	FAE1/ Type III polyketide synthase-like protein	0	15.3304	0	1.87584	0
common			NbS00030615g0019.1	Oligosaccharyl transferase STT3 subunit	1	AT1G34130.1	0	staurosporin and temperature sensitive 3-like B	1	integral component of membrane	protein glycosylation	Mapoly0130s0037.1	0	oligosaccharyl transferase	1	14.8524	1.20035	8.14514	0
common			Nbv6.1trA125626	ferredoxin--nadp leaf chloroplastic		AT1G20020.1	0	ferredoxin-NADP[+]-oxidoreductase 2		apoplast, chloroplast stroma, chloroplast thylakoid membrane protein complex, cytosol	defense response to bacterium, defense response to fungus, incompatible interaction, oxidation-reduction process, photosynthesis, response to cytokinin	Mapoly0062s0041.1	0	flavodoxin-related		14.8524	1.97	63.342	1.62151
common			NbS00046616g0009.1	Oligosaccharyl transferase STT3 subunit	3	AT5G19690.1	0	staurosporin and temperature sensitive 3-like A	3	endoplasmic reticulum membrane, integral component of membrane, plasma membrane	protein glycosylation, regulation of response to osmotic stress, response to salt stress	Mapoly0108s0026.1	0	oligosaccharyl transferase	3	14.7014	0	6.27686	0
common			Nbv6.1trA11495	cobw domain-containing protein 1		AT1G80480.1	0	plastid transcriptionally active 17		NA	NA	Mapoly0005s0038.1	9e-169	PRLI-interacting factor L		14.3598	1.29785	18.1186	0
common			Nbv6.1trA184467	long chain acyl- synthetase 4	6	AT4G23850.1	0	AMP-dependent synthetase and ligase family protein	6	cytosol, Golgi apparatus, plasma membrane	long-chain fatty acid metabolic process	Mapoly0099s0012.1	0	long-chain-fatty-acid COA ligase	4	13.9068	0	13.7727	0
common			Nbv6.1trA130325	elongation factor 1-gamma 2-like isoform x2		AT1G09640.1	0	translation elongation factor EF1B 2C gamma chain		cytosol, plasma membrane, plasmodesma, vacuole	translational elongation	Mapoly0062s0115.1	3e-158	elongation factory 1-gamma		13.3595	1.84927	15.508	0.81501
common			Nbv6.1trP45067	photosystem ii protein d2	1	ATCG00270.1	0	photosystem II reaction center protein D	1	chloroplast thylakoid membrane, integral component of membrane, plasma membrane-derived thylakoid photosystem II, plastoglobule	photosynthetic electron transport in photosystem II, protein-chromophore linkage	Mapoly0093s0016.1	3e-41	photosystem II P680 reaction centre protein	0	13.3595	5.83803	18.1737	0
common			NbS00018433g0002.1	Prenylated rab acceptor PRA1		AT2G38360.1	1e-82	prenylated RAB acceptor 1.B4		NA	NA	Mapoly0065s0006.1	3e-58	prenylated rab acceptor 1		13.194	4.03751	13.6322	0
common			NbS00013187g0013.1	26S proteasome non ATPase regulatory subunit 6	2	AT4G24820.2	0	26 proteasome regulatory subunit Rpn7	0	cytosol, nucleus, plasma membrane, proteasome complex	proteasome-mediated ubiquitin-dependent protein catabolic process, regulation of catalytic activity	Mapoly0014s0216.1	0	26S proteasome regulatory subunit N7	2	13.1122	3.43734	11.8266	0
common			Nbv6.1trP34674	probable uncharacterized protein LOC104216996	2	AT4G16180.2	0	transmembrane protein	1	NA	NA	Mapoly0066s0100.1	0	unknown	1	12.3302	0	0	0
common			NbS00007170g0004.1	Cytochrome P450	1	AT4G36220.1	0	ferulic acid 5-hydroxylase 1	0	NA	NA	Mapoly0109s0053.1	5e-112	cytochrome P450 CYP2 subfamily	0	12.2484	0	0	0
common			Nbv6.1trP4945	e3 ubiquitin-protein ligase upl2-like	6	AT1G55860.1	0	LOW protein: E3 ubiquitin ligase-like protein	1	NA	protein ubiquitination	Mapoly0090s0059.1	0	E3 ubiquitin-protein ligase HUWE1	0	12.1686	0	14.2966	0
common			Nbv6.1trP16911	protein argonaute 4-like	1	AT2G27040.2	0	Argonaute family protein	0	Cajal body, cytosol, nuclear euchromatin, nucleolus	defense response to bacterium, incompatible interaction, defense response to virus, histone H3-K9 methylation, long-distance posttranscriptional gene silencing, modulation by virus of host morphology or physiology, production of siR involved in chromatin silencing by small Rproduction of siR involved in R interference, regulation of translation, R phosphodiester bond hydrolysis, endonucleolytic, …	Mapoly0065s0059.1	0	eukaryotic translation initiation factor 2c	0	12.0994	0	11.6234	0
common			Nbv6.1trA6871	pra1 family protein f2-like	1	AT1G55190.1	2e-75	PRA1 (prenylated rab acceptor) family protein	1	endoplasmic reticulum, endosome, Golgi apparatus, vacuolar membrane	vesicle-mediated transport	Mapoly0065s0006.1	3e-36	prenylated rab acceptor 1	0	12.0849	1.20035	10.8849	0
common			Nbv6.1trP50123	er membrane protein complex subunit 8 9 homolog		AT5G55940.1	2e-99	Uncharacterized protein family		NA	NA	Mapoly0118s0025.1	6e-70	uncharacterized conserved protein encoded by sequence overlapping the COX4 gene		11.9339	0	9.08306	0
common			NbS00001483g0005.1	Calcium transporting ATPase endoplasmic reticulum type	1	AT4G00900.2	0	ER-type Ca2+-ATPase	0	endoplasmic reticulum, integral component of membrane	ATP hydrolysis coupled cation transmembrane transport, calcium ion transmembrane transport, proton transmembrane transport	Mapoly0013s0119.3	0	calcium-transporting ATPase	0	11.9339	0	1.86828	0
common			NbS00048356g0005.1	T complex protein 1 subunit alpha		AT3G20050.1	0	T-complex protein alpha subunit		NA	NA	NbS00048356g0005.1	0	chaperonin complex, TCP-1 alpha subunit (CCT1)		11.9339	0	1.86828	0
common			Nbv6.1trA45428	mannosyl-oligosaccharide glucosidase gcs1-like	1	AT1G67490.1	0	glucosidase 1	0	endoplasmic reticulum membrane	epidermal cell differentiation, protein N-linked glycosylation, root epidermal cell differentiation	Mapoly0071s0095.1	0	mannosyl-oligosaccharide glucosidase	0	11.5356	0	1.73533	0
common			NbS00026258g0017.1	60S ribosomal protein L36		AT3G53740.4	1e-55	ribosomal protein L36e family protein		cytosolic large ribosomal subunit, vacuolar membrane	cytoplasmic translation	Mapoly0005s0062.1	3e-53	large subunit ribosomal protein L36e		11.4578	0.648926	5.47945	0
common			Nbv6.1trP15300	rna polymerase alpha subunit		ATCG00740.1	0	RNA polymerase subunit alpha		chloroplast stroma, chloroplast thylakoid, nucleoid	transcription, D-templated	Mapoly0026s0099.1	1e-55	DNA-directed RNA polymerase subunit alpha		11.4538	1.20035	10.021	0
common			NbS00029456g0006.1	Aquaporin 1	1	AT2G37170.2	9e-169	plasma membrane intrinsic protein 2	1	integral component of membrane	transmembrane transport	Mapoly0041s0003.1	7e-153	aquaporin PIP	1	11.372	1.29785	8.95012	0
common			Nbv6.1trP50802	protoporphyrinogen oxidase chloroplastic		AT4G01690.1	0	Flavin containing amine oxidoreductase family		chloroplast envelope, chloroplast thylakoid	chlorophyll biosynthetic process, oxidation-reduction process, protoporphyrinogen IX biosynthetic process	Mapoly0001s0469.1	0	protoporphyrinogen oxidase		11.1393	0	19.3186	0
common			Nbv6.1trP19501	40s ribosomal protein s7-like	2	AT3G02560.3	1e-88	ribosomal protein S7e family protein	0	chloroplast, cytosolic small ribosomal subunit, Golgi apparatus, membrane, small-subunit processome	ribosomal small subunit biogenesis, rR processing, translation	Mapoly0060s0109.1	4e-82	small subunit ribosomal protein S7e	0	10.9777	1.80052	11.7677	0.806498
common			Nbv6.1trP19501	40s ribosomal protein s7-like	2	AT3G02560.3	1e-88	ribosomal protein S7e family protein	0	chloroplast, cytosolic small ribosomal subunit, Golgi apparatus, membrane, small-subunit processome	ribosomal small subunit biogenesis, rR processing, translation	Mapoly0060s0109.1	4e-82	small subunit ribosomal protein S7e	0	10.9777	1.80052	11.7677	0.806498
common			NbS00010886g0114.1	NbS00010886g0114.1		AT3G20560.1	0	PDI-like 5-3		cell, integral component of membrane	cell redox homeostasis	Mapoly0033s0073.1	0	thioredoxin-related		10.8228	0	0	0
common			Nbv6.1trA269378	acetyl-coenzyme a carboxylase carboxyl transferase subunit chloroplastic	1	AT2G38040.2	0	acetyl co-enzyme a carboxylase carboxyltransferase	0	acetyl-CoA carboxylase complex, chloroplast inner membrane, chloroplast stroma	fatty acid biosynthetic process, malonyl-CoA biosynthetic process	Mapoly0083s0025.2	0	acetyl-CoA carboxylase carboxyl transferase	0	10.8228	0	0.867665	0
common			Nbv6.1trA82735	trafficking protein particle complex subunit 10 isoform x1	1	AT5G54440.1	0	CLUB	1	cytosol, early endosome, trans-Golgi network, TRAPPII protein complex	cell plate assembly, early endosome to Golgi transport, intra-Golgi vesicle-mediated transport	Mapoly0031s0138.1	0	epilepsy holoprosencephaly candidate 1/ TMEM1	1	10.59	0	11.7563	0
common			NbS00016582g0009.1	Cytochrome P450	1	AT3G14690.1	0	cytochrome P450 2C family	1	NA	oxidation-reduction process	Mapoly0052s0003.1	8e-124	cytochrome P450 CYP4/CYP19/CYP26 subfamilies	0	10.2755	0	0	0
common			Nbv6.1trP13803	uncharacterized aarf domain-containing protein kinase chloroplastic	2	AT3G24190.1	0	protein kinase superfamily protein	2	chloroplast	protein phosphorylation	Mapoly0134s0032.1	0	ABC1 family protein kinase	1	10.2755	0	0.937922	0
common			Nbv6.1trP64367	40s ribosomal protein s4-like	1	AT5G58420.1	0	Ribosomal protein S4 (RPS4A) family protein	1	cytosolic small ribosomal subunit, Golgi apparatus, membrane, nucleolus	translation	Mapoly0012s0120.1	4e-164	small subunit ribosomal protein S4e	1	10.1937	4.03751	12.6942	3.10319
common			Nbv6.1trA159249	alpha beta-hydrolases superfamily protein isoform 1	1	AT1G52510.1	0	alpha/beta-Hydrolases superfamily protein	0	NA	NA	Mapoly0030s0015.1	1e-158	alpha/beta hydrolase fold-containing protein	0	10.1937	0	28.2801	0.403249
common			Nbv6.1trP47800	aldehyde dehydrogenase family 3 member f1-like	1	AT4G36250.1	0	aldehyde dehydrogenase 3F1	0	endoplasmic reticulum, membrane	metabolic process	Mapoly0030s0099.1	4e-154	ALDEHYDE DEHYDROGENASE		9.48288	1.41858	21.6481	0.407505
common			Nbv6.1trA6964	alpha beta hydrolase family protein		AT1G74640.1	0	alpha/beta-Hydrolases superfamily protein		NA	NA	Mapoly0229s0006.1	2e-121	predicted hydrolase/ acyltransferase		9.31734	0	17.1844	0
common			Nbv6.1trA11488	cysteine desulfurase mitochondrial		AT5G65720.3	0	nitrogen fixation S (NIFS)-like 1		mitochondrion	[2Fe-2S] cluster assembly	Mapoly0184s0007.1	0	cysteine desulfurase		9.16635	1.29785	24.5911	0
common			Nbv6.1trP54873	uroporphyrinogen decarboxylase	1	AT2G40490.1	0	Uroporphyrinogen decarboxylase	1	chloroplast envelope, chloroplast stroma, cytosol	chlorophyll biosynthetic process, protoporphyrinogen IX biosynthetic process, response to cytokinin	Mapoly0103s0078.1	0	METHYLTETRAHYDROFOLATE:HOMOCYSTEINE METHYLTRANSFERASE RELATED		9.08458	1.20035	15.2345	2.28818
common			Nbv6.1trP45557	threonine--trna mitochondrial	1	AT5G26830.1	0	Threonyl-tRNA synthetase	1	cell wall, chloroplast, cytosol, Golgi apparatus, mitochondrion, plasma membrane	threonyl-tR aminoacylation	Mapoly0065s0074.1	0	threonine-tRNA ligase	1	8.93359	0	11.9595	0.407505
common			Nbv6.1trA215778	zeaxanthin epoxidase	2	AT5G67030.1	0	zeaxanthin epoxidase (ZEP) (ABA1)	1	chloroplast envelope, membrane	abscisic acid biosynthetic process, oxidation-reduction process, response to heat, response to red light, response to water deprivation, sugar mediated signaling pathway, xanthophyll biosynthetic process	Mapoly0028s0084.1	0	Zeaxanthin epoxidase		8.85183	1.29785	19.1932	0
common			Nbv6.1trP764	long chain acyl- synthetase 1	2	AT2G47240.3	0	AMP-dependent synthetase and ligase family protein	0	endoplasmic reticulum	cutin biosynthetic process, long-chain fatty acid metabolic process, wax biosynthetic process,	Mapoly0099s0012.1	0	Long-chain-fatty-acid--CoA ligase	0	8.84983	0.648926	13.7651	0
common			NbS00016839g0002.1	40S ribosomal protein S2 2	1	AT1G59359.1	5e-147	Ribosomal protein S5 family protein	1	cell wall, cytosolic small ribosomal subunit, Golgi apparatus, membrane, plasmodesma	translation	Mapoly0027s0187.1	7e-147	small subunit ribosomal protein S2e	0	8.5353	0	14.5701	2.02476
common			Nbv6.1trP75893	cellulose synthase a catalytic subunit 2	2	AT5G64740.1	0	cellulose synthase 6	1	cellulose synthase complex, integral component of plasma membrane, trans-Golgi network	cell wall organization, cellulose biosynthetic process, cortical microtubule organization, multidimensional cell growth, plant-type primary cell wall biogenesis	Mapoly0076s0014.1	0	cellulose synthase (UDP-forming)	1	8.45553	24.4688	60.2699	0
common			Nbv6.1trA51581	gram domain-containing protein 1a	1	AT1G02120.1	5e-166	GRAM domain family protein	0	endoplasmic reticulum	defense response to bacterium, negative regulation of programmed cell death, response to ethylene, response to salicylic acid	Mapoly0083s0023.1	1e-133	Uncharacterized conserved protein	0	8.30454	1.20035	42.1079	0
common			Nbv6.1trP41948	psbp domain-containing protein chloroplastic		AT3G56650.1	1e-127	thylakoid lumenal protein (Mog1/PsbP/DUF1795-like photosystem II reaction center PsbP family protein)		chloroplast stroma, chloroplast thylakoid lumen, extrinsic component of membrane, photosystem II oxygen evolving complex	photosynthesis	Mapoly0008s0145.1	4e-110	PsbP		8.139	1.29785	30.8128	0
common			Nbv6.1trP4906	photosystem i p700 apoprotein a2	1	ATCG00340.1	0	Photosystem I 2C PsaA/PsaB protein	1	chloroplast envelope, chloroplast thylakoid membrane, integral component of membrane, photosystem I, plastoglobule	electron transport chain, photosynthesis, protein-chromophore linkage	Mapoly0043s0109.1	8e-19	photosystem II P700 chlorophyll a apoprotein A2	0	7.97547	7.37734	15.5669	1.62151
common			Nbv6.1trA254975	photosystem i reaction center subunit chloroplastic		AT1G31330.1	3e-114	photosystem I subunit F		chloroplast envelope, chloroplast thylakoid membrane, integral component of membrane, photosystem I reaction center, plastoglobule	photosynthesis	Mapoly0075s0057.1	1e-82	photosystem I subunit III		7.42618	1.20035	13.6322	0.81501
common			NbS00027305g0008.1	Chlorophyll a b binding protein 6A chloroplastic		AT3G08940.2	6e-171	light harvesting complex photosystem II		chloroplast thylakoid membrane, integral component of membrane, photosystem I, photosystem II	photosynthesis, light harvesting, protein-chromophore linkage	Mapoly0001s0025.1	3e-142	light-harvesting complex II chlorophyll a/b binding protein 4		7.11166	0.600173	11.0956	0.403249
common			Nbv6.1trP59901	photosystem ii protein d1		ATCG00020.1	0	photosystem II reaction center protein A		chloroplast thylakoid membrane, integral component of membrane, photosystem II, plastoglobule	photosynthetic electron transport in photosystem II, protein-chromophore linkage, response to herbicide	Mapoly0093s0016.1	0	photosystem II P680 reaction centre protein		6.79713	4.68644	13.7651	2.69568
common			Nbv6.1trA87986	photosystem ii protein d1	1	AT1G71810.1	0	Protein kinase superfamily protein	1	plastoglobule	protein phosphorylation	Mapoly0121s0049.1	0	CHAPERONE-ACTIVITY OF BC1 COMPLEX (CABC1)-RELATED	1	6.48061	1.29785	11.6196	0
common			Nbv6.1trP13185	sh3 domain-containing protein isoform 3	1	AT2G07360.1	0	SH3 domain-containing protein	0	NA	NA	Mapoly0015s0202.1	0	formin binding protein and related proteins	0	5.68602	0	13.8467	0
